1 **Title**

2 Microbial community dynamics and coexistence in a sulfide-driven phototrophic bloom

3

4 **Authors**

5 Srijak Bhatnagar†, Elise S. Cowley†, Sebastian H. Kopf, Sherlynette Pérez Castro,  
6 Sean Kearney, Scott C. Dawson, Kurt Hanselmann, S. Emil Ruff \*

7 † Denotes equal contribution

8 \* Corresponding author

9

10 **Author Affiliations**

11 SB: Geomicrobiology Group, University of Calgary, Alberta, Canada;  
12 srijak.bhatnagar@ucalgary.ca

13 ESC: Medical Scientist Training Program, School of Medicine and Public Health,  
14 University of Wisconsin-Madison, Madison, WI, USA; ecowley@wisc.edu

15 SHK: Department of Geological Sciences, University of Colorado, Boulder, CO, USA;  
16 sebastian.kopf@colorado.edu

17 SPC: Ecosystems Center/Bay Paul Center, Marine Biological Laboratory, Woods Hole,  
18 MA, USA; sperezcastro@mbl.edu

19 SK: Department of Biological Engineering, Massachusetts Institute of Technology,  
20 Cambridge, MA, USA; skearney@mit.edu

21 SCD: Department of Microbiology and Molecular Genetics, University of California  
22 Davis, CA, USA; scdawson@ucdavis.edu

23 KH: Department of Earth Sciences, ETH-Z, Zürich, CH; kurt.hanselmann@erdw.ethz.ch

24 SER: Ecosystems Center/Bay Paul Center, Marine Biological Laboratory, Woods Hole,  
25 MA, USA; eruff@mbl.edu

26

27 **Keywords**

28 Microbial succession, Green sulfur bacteria, Prosthecochloris, microbial bloom, brackish  
29 coastal ecosystem, anoxygenic phototrophy, Microviridae, virus, CRISPR-Cas,  
30 resilience

## 31 **Abstract**

32 Phototrophic microbial mats commonly contain multiple phototrophic lineages that  
33 coexist based on their light, oxygen and nutrient preferences. Here we show that similar  
34 coexistence patterns and ecological niches can occur in suspended phototrophic  
35 blooms of an organic-rich estuary. The water column showed steep gradients of  
36 oxygen, pH, sulfate, sulfide, and salinity. The upper part of the bloom was dominated by  
37 aerobic phototrophic *Cyanobacteria*, the middle and lower parts were dominated by  
38 anoxygenic purple sulfur bacteria (*Chromatiales*) and green sulfur bacteria  
39 (*Chlorobiales*), respectively. We found multiple uncultured phototrophic lineages and  
40 present metagenome-assembled genomes of two uncultured organisms within the  
41 *Chlorobiales*. Apparently, those *Chlorobiales* populations were affected by *Microviridae*  
42 viruses. We suggest a cryptic sulfur cycle within the bloom in which elemental sulfur  
43 produced by phototrophs is reduced to sulfide by *Desulfuromonas sp.* These findings  
44 improve our understanding of the ecology and ecophysiology of phototrophic blooms  
45 and their impact on biogeochemical cycles.

## 46 **Introduction**

47 Estuarine and coastal water bodies are dynamic and ubiquitous ecosystems that are  
48 often characterized by the mixing of terrestrial freshwater and ocean saltwater. Brackish  
49 habitats can have striking physical and chemical characteristics that differ from both  
50 fresh and saltwater ecosystems (McLusky and Elliott, 2004; Moore, 1999). Brackish  
51 ecosystems are very diverse and support large microbial and macrobial communities  
52 (McLusky and Elliott, 2004). Estuaries also provide crucial ecosystem services, the  
53 most salient of which is trapping and filtering terrestrial runoffs and pollutants before  
54 they enter the oceans (Jay et al., 2007; Nelson and Zavaleta, 2012; Pant and Reddy,  
55 2001).

56 Estuaries harbor abundant and diverse microbial communities that participate in the  
57 cycling of carbon, nitrogen, sulfur, and phosphorus. These communities fix carbon  
58 dioxide through photosynthesis or chemosynthesis (Boschker et al., 2014; Ritchie and  
59 Johnson, 2012; Waidner and Kirchman, 2005). Additionally, carbon introduced as

60 organic matter from the oceans or land can be remineralized by heterotrophic microbial  
61 communities (Moran et al., 2000; Peduzzi and Herndl, 1991; Smith and Hollibaugh,  
62 1993). This decomposition can deposit sulfide in sediments (Capone and Kiene, 1988).  
63 Further, sulfate brought into estuaries by ocean waters can be utilized by sulfate  
64 reducers, which convert sulfate into elemental sulfur or sulfide (Capone and Kiene,  
65 1988; Purdy et al., 2002). The combination of sulfate introduced by ocean water and  
66 sulfide released from decomposition in the sediments is part of the chemocline of the  
67 brackish water column (Zopfi et al., 2001). Additionally, estuaries and coastal marshes  
68 often exhibit a halocline and the depletion of oxygen in the water column can create an  
69 oxycline (Lee et al., 2015; Long, 1976). These gradients can produce habitats and  
70 niches that influence microbial community structure at different depths and conversely  
71 the microbial community can respond to these gradients (Jørgensen and Revsbech,  
72 1983; Møller et al., 1985; Wimpenny et al., 1982).

73 The physicochemical properties of estuaries fluctuate frequently and rapidly as a result  
74 of many factors, for example, tidal cycles, weather patterns, and seasonal cycles (Allen  
75 et al., 1980; Badr et al., 2008; Garvine, 1985; Haas, 1977; Maie et al., 2006; Simpson et  
76 al., 1990). Such disturbances can bring about noticeable changes in the microbial  
77 community structure of the ecosystem, including blooms or declines in the populations  
78 of one or more members of the microbial community, as well as changes in the richness  
79 and evenness of the community (Bernhard et al., 2005; Henriques et al., 2006; Lv et al.,  
80 2016; Muylaert et al., 2000; Zaikova et al., 2010).

81 Trunk River in Woods Hole, MA is a brackish ecosystem, on the coast of Vineyard  
82 Sound (N 41.535236, W -70.641298). Near the mouth, Trunk River forms a shallow  
83 lagoon where freshwater mixes with seawater. Storms, tides, and run-off introduce large  
84 amounts of biomass to the pond forming thick layers of decaying seagrass and other  
85 organic matter. The pond has a distinct sulfidic odor that emanates from the water and  
86 gases bubble up from the sediment. Episodically, strikingly yellow microbial blooms can  
87 be observed just below the water surface (see Figure 1, S1) that typically disappear  
88 again within days to weeks. These transient blooms were observed to occur in natural  
89 depressions in the decaying organic matter and anecdotally seemed to be initiated by

90 physical disturbance events, potentially from storms, tidal extremes, human activity, or  
91 animals. Given this visually striking natural ecological progression, we set out to test  
92 whether physical disturbance alone could trigger the blooms.

93 To understand the mechanisms of bloom development, we thus mimicked such  
94 disturbances of the brackish ecosystem by creating artificial depressions in the  
95 decaying organic matter, and monitored the microbial community response and  
96 population dynamics, as well as investigated ecological niches of the key populations.  
97 Based on previous observations, we hypothesized that i) the disturbance would cause a  
98 sulfide-driven phototrophic bloom ii) due to its rapid development the bloom would be  
99 largely dominated by very few populations and iii) sharp photo-/ and physicochemical  
100 gradients would establish that cause narrow habitats and niches. We discuss the  
101 resulting reproducible ecological succession and provide insights into the habitats,  
102 niches, and resilience of such widespread ecosystems. Our findings contribute to the  
103 understanding of the ecological processes and dynamics that shape phototrophic  
104 blooms, which are a naturally occurring phenomenon in many ecosystems.

## 105 **Results**

### 106 Visual Observations

107 At the first sampling time point (2 days post-disturbance), no difference was observed in  
108 the water column or in the samples collected from different depths. Two days later (time  
109 point 2, 4 days post-disturbance), a faint pink layer was observed in the water column,  
110 and faint shades of yellow in samples from the 25 cm depth (Figure S2). At the next  
111 sampling time point (time point 3; 5 days post-disturbance), we observed a bright yellow  
112 suspension below the water surface (Figure 1). Of the samples collected at this time  
113 point, the samples from 25 cm depth were most distinctly yellow (Figure S2). The yellow  
114 color of the suspension intensified by time point 4 (7 days post-disturbance). No  
115 remarkable visual changes in the system were observed for the subsequent three time  
116 points (time points 5, 6, and 7). During these three time points, the yellow suspension  
117 only slightly changed. At time point 8 (16 days post-disturbance), the holes had partially  
118 collapsed, the water was much clearer and the 25-cm samples showed a reduction in

119 the intensity of the yellow color (Figure S2). We found a green layer at the bottom of  
120 each hole, seemingly from sedimented GSB. It has to be noted that the opacity of the  
121 samples was higher at the first two timepoints than at the following timepoints.  
122 Especially at timepoint 1 the suspension was beige and very opaque, while later on the  
123 suspension became more yellow, but also more translucent (Figure S2).

124

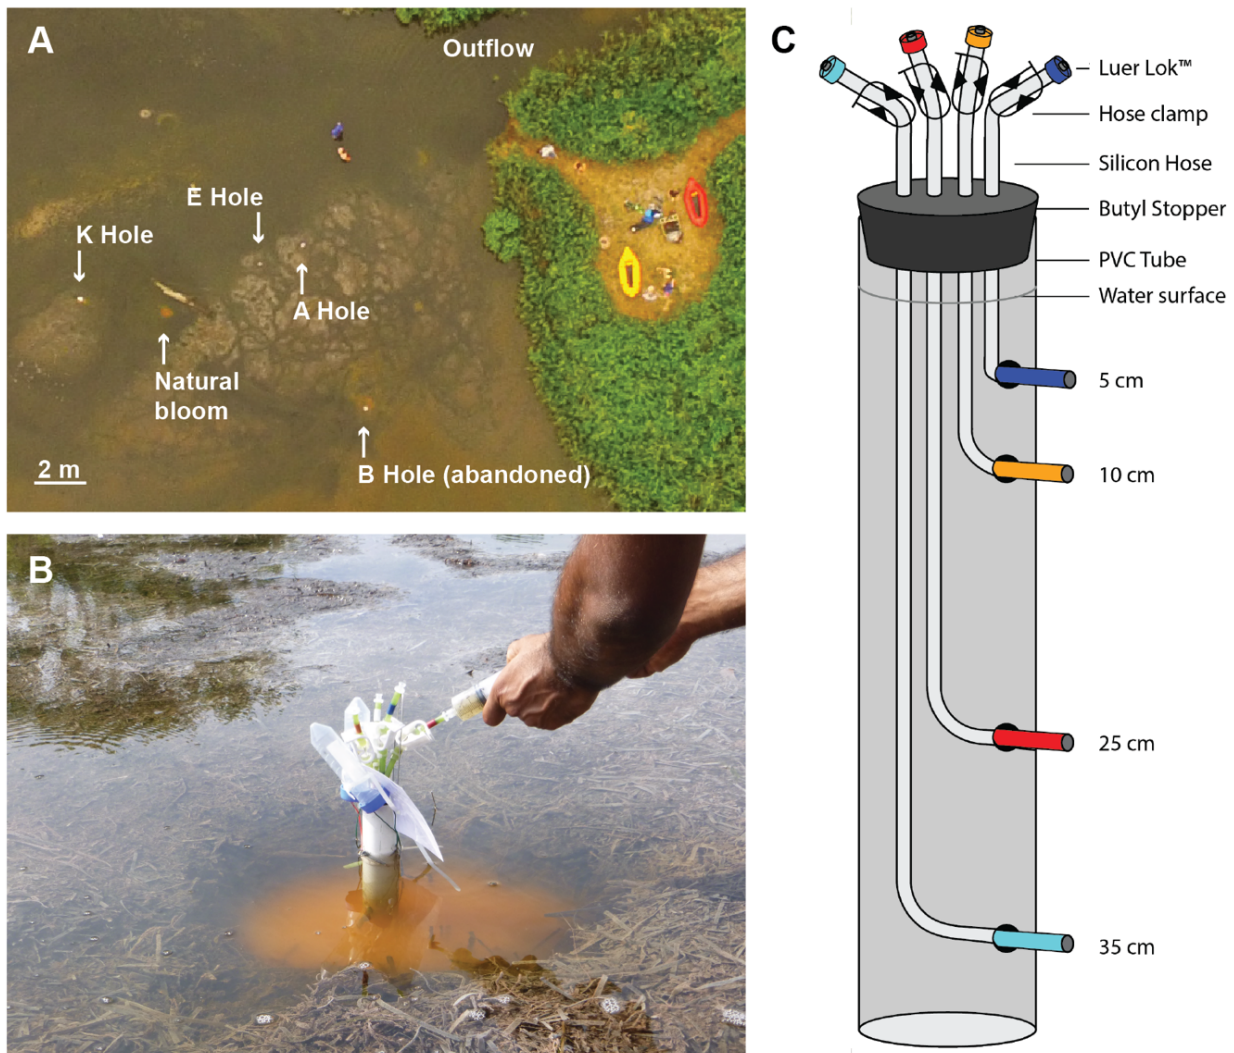

125

126 **Figure 1: Sampling sites.** **A.** Aerial view of experimental sites (A, E, and K) in the Trunk river  
127 lagoon. The water enters the lagoon from the right and exits to the sea through a channel  
128 marked outlet. **B.** View of a **LEMON** (Long-term **E**nvironmental **M**ONitoring) sampling device  
129 during sample collection on time point 3; 5 days post-disturbance. **C.** Schematic of the LEMON.

## 130 Physicochemistry of the water column

131 Within the first three days the pH decreased between one and two units in all layers,  
132 with lowest values present in the deepest layer (Figure 2). Over the 15-day sampling  
133 period, pH showed more variation in the two upper layers than in the two deeper layers  
134 where it was very constant at values between 6 and 6.3. Throughout the experiment the  
135 water column in all three experiments showed a stable halocline with brackish water (5  
136 ‰ salinity) at the water surface and saltwater (30 ‰) at 35 cm depth (Figure 2). Salinity  
137 increased with depth and was 12 ‰ and 23 ‰ at 10 cm and 25 cm, respectively. Major  
138 ions also reflect this trend (e.g. calcium, potassium in Figure S5). The dissolved oxygen  
139 (DO) concentrations showed a stable oxycline between 10 and 25 cm. Above 10 cm,  
140 DO was always higher than 20 % ( $36 \pm 17$  %) and below that DO was always below 20  
141 % ( $9 \pm 9$  %). The oxygen concentration slowly decreased in the upper two layers during  
142 the first half of the experiment, but recovered again to the original values towards the  
143 end of the experiment. At 5 and 10 cm, DO was approximately 41 % and 30 %,   
144 respectively (Figure 2). At 25 and 35 cm, the average DO measurements were  $\approx 12$  %  
145 and 5%, respectively. The sulfate concentrations in the water column decreased along  
146 the depth gradient, with the highest sulfate concentration at 5 cm ( $\approx 2$  mM) and the  
147 lowest at 25 cm ( $\approx 0.2$  mM) (Figure 2). In contrast, the sulfide concentrations were  
148 lowest at 5 cm (Figure 2F). Interestingly, the greatest sulfide concentration was  
149 measured at 10 cm depth peaking at over 1 mM towards the end of the experiment.  
150 Below 10 cm, sulfide concentration was still high, but declined to  $0.75 \text{ mM} \pm 0.22$  at 25  
151 cm and  $0.5 \text{ mM} \pm 0.17$  at 35 cm. The normalized biomass measured for the 5 cm  
152 samples throughout the sampling period was nearly zero (Figure 2). At 10 cm, 25 cm,  
153 and 35 cm, the normalized biomass measured was approximately, 0.2 mg/mL, 0.3  
154 mg/mL, and 0.2 mg/mL, respectively. For details concerning iron (Fe(II), Fe(III), total  
155 Fe), nitrate, calcium, potassium, ammonium and acetate refer to Supplementary Results  
156 and Figure S5.

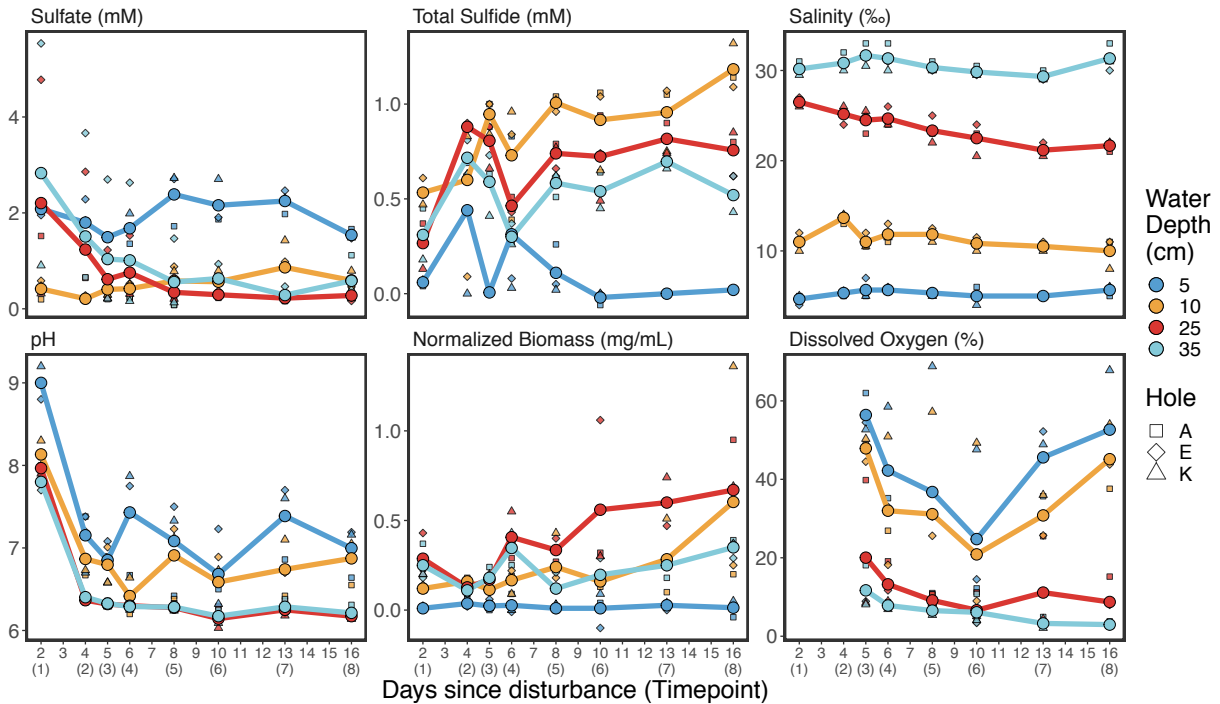

157

158 **Figure 2: Physicochemistry.** The physicochemical measurements of the sampling sites.  
159 Salinity (parts per thousand). The x-axis shows days since disturbance and the y-axis the  
160 respective units. For further parameters (Fe (II); Fe (III); Total Fe, nitrate) refer to SI.

161

## 162 Spectral Absorbance of Phototrophic Community

163 We measured absorbance spectra from filters of samples from A, E and K experiments  
164 (Figure S3) and compared the spectra to those of representative cultured species of the  
165 most abundant phototrophic genera from the literature (Borrego et al., 1999; Caumette  
166 et al., 1997; Oren, 2011; Srinivas et al., 2009; Stomp et al., 2008). All absorbance  
167 spectra were normalized to the respective highest peak (Figure 3). Our results show  
168 that pigments belonging to PSB were prominent in the upper layer of the bloom (orange  
169 spectra), while GSB pigments dominated the lower layer of the bloom (red line).  
170 Pigments characteristic for *Cyanobacteria* were less abundant at peak bloom and  
171 increased relatively at the end of the experiment. Pigments of all major phototrophs  
172 were detected throughout the experiment. The spectral results suggest the coexistence  
173 of multiple phototrophs over the entire duration of the experiment.

## Top: samples

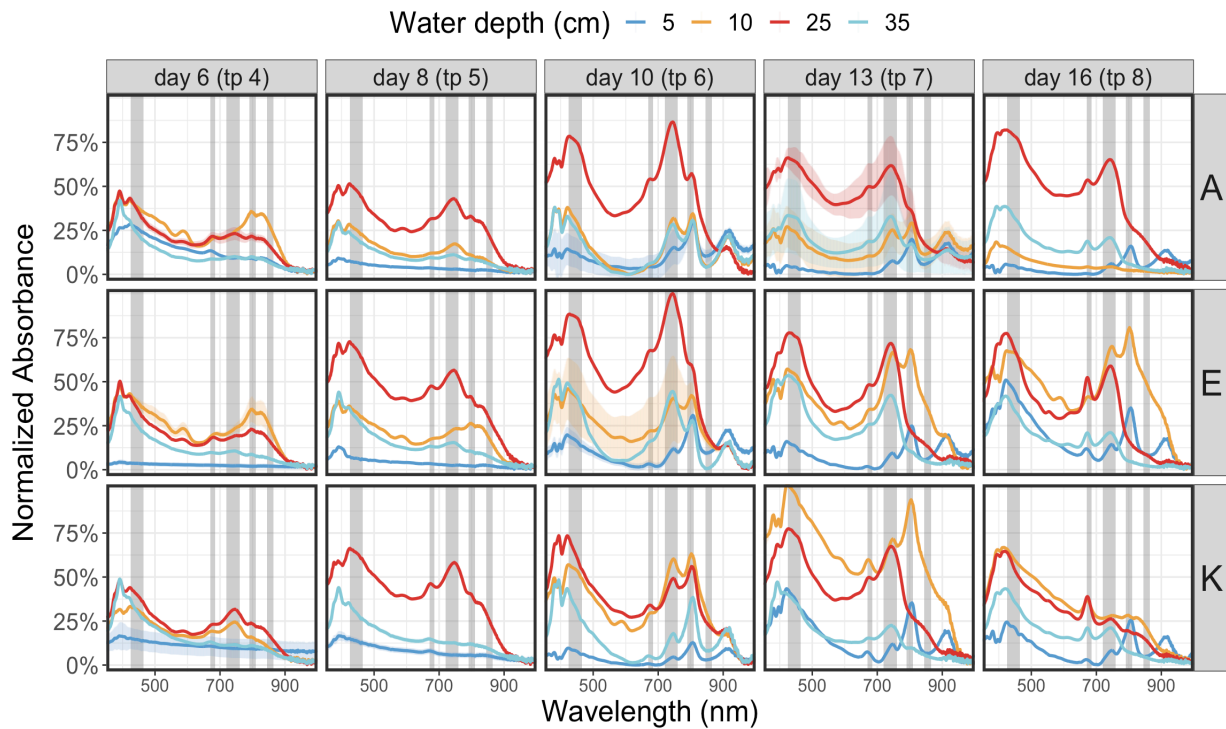

## Bottom: cultures

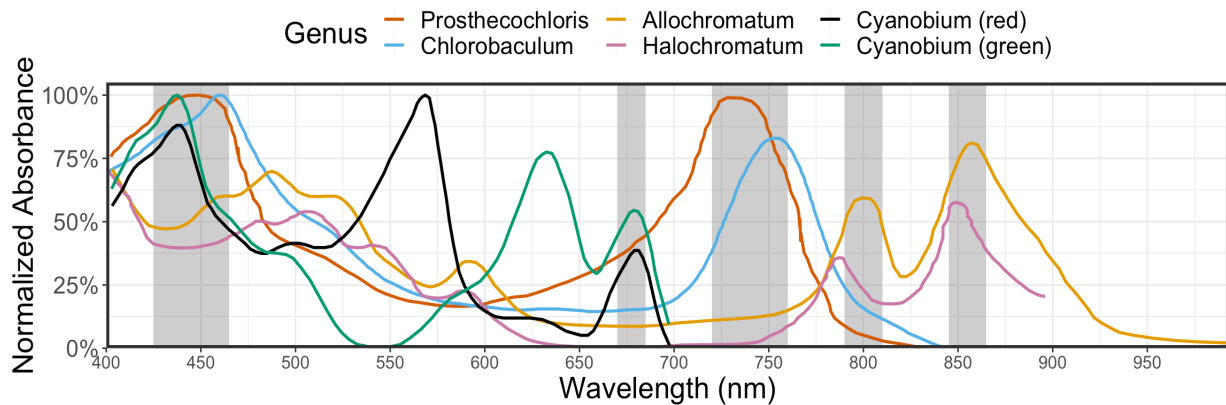

174

175 **Figure 3: Spectral Absorbance.** Sample spectra show averages of at least three replicates per  
 176 sample. Color bands in the sample data indicate one standard deviation (bands are mostly  
 177 smaller than center line). Gray vertical bands indicate major absorbance peaks of the  
 178 *Prosthecochloris* and *Chlorobaculum* group (720-760 nm) and the *Allochromatium* and  
 179 *Halochromatium* group (790-810 nm and 845-865 nm) highlighting the transient appearance  
 180 and likely dominance of these phototrophs over the course of the experiments. Also indicated is  
 181 the general phototroph absorbance band in the 425-465 nm window. Cyanobacterial groups  
 182 (red and green) have distinct absorbance peaks in the 500-700 nm range that are not prominent  
 183 in the sample spectra except for the characteristic 670-685 nm peak (also highlighted in gray)  
 184 reflecting the presence but likely smaller role of these taxa during the experiment.

185



## 186 Microbial Community Structure and Taxonomic Composition

187 At the beginning of the experiment, the microbial diversity was high in all four water  
188 depths and very similar across replicate ecosystems. Alpha diversity rapidly decreased  
189 with the onset of the bloom, and within two days the communities in the four depth  
190 layers substantially changed (Figure 4, 5, S6, S7). The number of observed amplicon  
191 sequence variants (ASV), as well as estimated richness, Shannon entropy, and Inverse  
192 Simpson diversity significantly decreased between the surface water and the water at a  
193 depth of 10 cm and 25 cm (Figure 4;  $p=0.001$ ). This change is most striking in the case  
194 of Inverse Simpson diversity, a measure for evenness. In just one day, evenness  
195 dropped in both 10 cm and 25 cm water depth by over one order of magnitude to low  
196 single digit values (Figure 4; Table S1). This means the community was extremely  
197 dominated by one ASV (a pure culture has an Inverse Simpson diversity of 1).

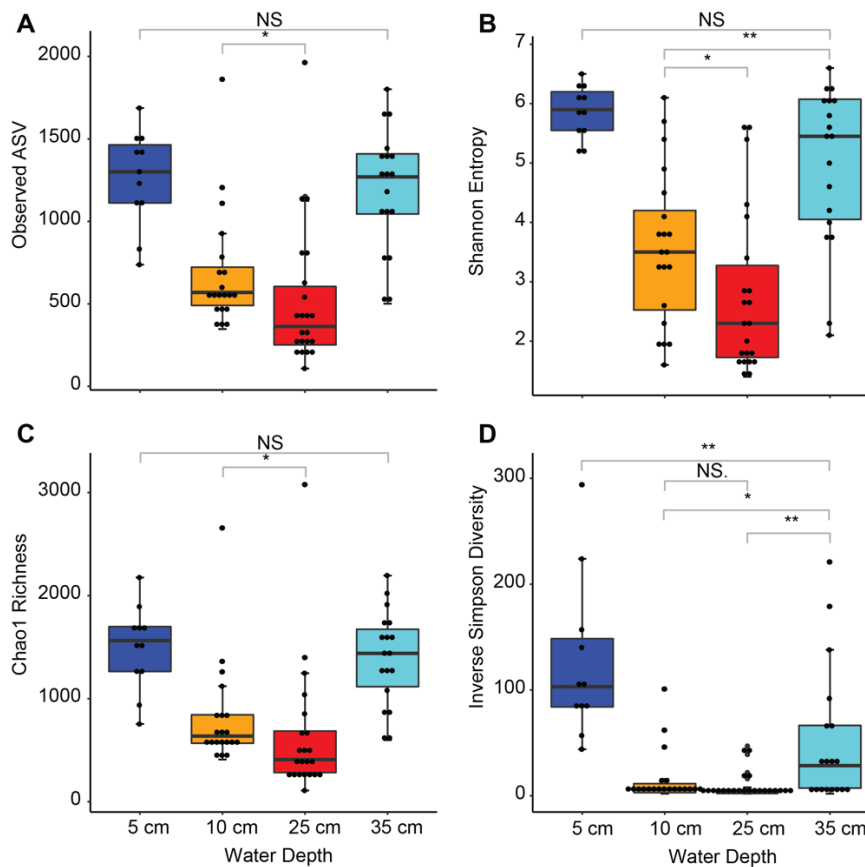

198

199 **Figure 4: Alpha diversity.** Diversity Indices of all samples grouped by depth. Pairwise comparisons with low significance levels are shown (NS, \*:  $p<0.1$ , \*\*:  $p<0.01$ ). All pairwise comparisons that are not shown were highly significant (\*\*\*:  $p<0.001$ ), e.g. panel A 5 cm vs 10 cm.  
200  
201

202 The rapid and profound change of community structure is corroborated by a high  
203 turnover of ASV between the layers and timepoints, as shown by non-metric  
204 multidimensional scaling (Figure 5, S7). The top layer is well separated from the deeper  
205 layers. The communities at 25 cm water depth experienced the largest turnover, i.e.  
206 change in community structure, as shown in the ordination (Figure 5). The more distant  
207 two points are on the ordination plot the less similar are the underlying communities.  
208 Interestingly, the communities of all three deep layers (15 – 35 cm) had a similar  
209 community structure at the beginning of the experiment and then seemed to converge  
210 again at the end, yet at a different part of the ordination plot. This pattern on the  
211 ordination plot indicates that the bloom shifted the microbial communities to an  
212 alternative stable state.

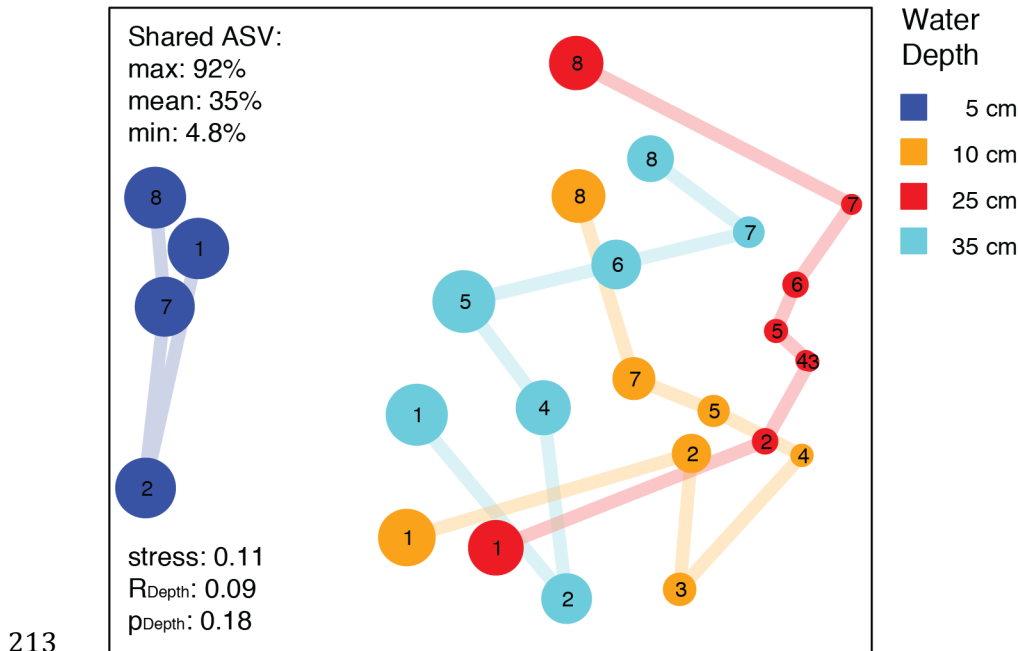

214 **Figure 5: Microbial Community Turnover.** Circle size represents average Shannon Diversity  
215 across three replicate holes. Sampling time points are indicated as numbers. The ordination  
216 shows that communities in 15-35 cm water depth are very different from those in the top layer.  
217 The trajectories indicate that layer 2 and 3 underwent the most substantial changes in  
218 community structure. The community at 25 cm depth had a striking loss in diversity during the  
219 experiment, yet seemed to have recovered at the last time point. Holes were very similar (see SI  
220 Figure S4) and were averaged for clarity. ASV: Amplicon Sequence Variant. Depth is not a  
221 significant indicator for community structure using replicate averages, however in each hole the  
222 communities in the different layers are overlapping but different (see Figure S4).

223 The taxonomic composition was assessed at all phylogenetic levels (Figure 6, S8). We  
224 observed a total of 73 bacterial phyla. The surface community (5 cm) remained  
225 relatively unchanged throughout the experiment and was dominated by *Proteobacteria*,  
226 *Chlorobi*, *Cyanobacteria* and *Actinobacteria*. The communities in the deeper layers were  
227 more dynamic, being dominated by *Bacteroidetes*, *Proteobacteria*, *Firmicutes*, and  
228 *Chloroflexi*. In general, taxonomic diversity was highest in the deepest layer (35 cm).  
229 The profound change in diversity was accompanied by a change in composition. Within  
230 a few days, there was a substantial increase in the abundance of *Chlorobi*, which  
231 comprised more than 75% of the community at that time. This increase persisted for  
232 nine days, but levelled off at the end of the experiment. The datasets of all layers and  
233 timepoints were dominated by ASVs affiliating with phototrophic organisms, as shown  
234 by relative sequence abundances on genus level (Figure 6A). Some phototrophs  
235 occurred in all layers at similar relative sequence abundances, such as *Halochromatium*  
236 and “*Candidatus Chloroploca*”. The stable surface layer harbored *Cyanobium* and  
237 “*Candidatus Aquiluna*”, which decreased in the deeper layers. The upper layer of the  
238 bloom showed an increased relative sequence abundance of *Allochromatium*, the lower  
239 bloom layer was dominated by *Prosthecochloris* and *Chlorobaculum* (Figure S10).  
240 Interestingly, almost all *Prosthecochloris* affiliated reads belonged to a single sequence  
241 variant, while ASV diversity affiliated with the closely related *Chlorobaculum* increased  
242 over time (Figure 6B, S9).

243 The relative sequence abundance of *Chlorobiales* noticeably changed at 25 cm depth,  
244 where the yellow microbial bloom was visually observed. *Chlorobiales* ASVs accounted  
245 for >25 % of reads in our dataset. To identify the phylogeny of ASV affiliating with  
246 *Chlorobiales*, we placed the representative sequence of each ASV on a reference tree  
247 of known *Chlorobiales*. The most abundant *Chlorobiales* ASV (ASV\_1) affiliated with the  
248 genus *Prosthecochloris*, and specifically in the monophyletic clade of *Prosthecochloris*  
249 *vibrioformis* (Figure S11), followed by an ASV (ASV\_2) affiliating with *Chlorobaculum*.  
250 Together, these two ASVs account for >97 % of the *Chlorobiales* reads. In general, we  
251 found a high number of unclassified lineages. The 20 most abundant ASV accounted for  
252 about 50 % of all sequences, twelve of those belonged to unclassified genera or

253 families (Figure S8B). The novelty was especially high within the *Chromatiaceae* five of  
 254 the eight ASV that ranked among the “top 20” belonged to an unclassified genus.

255

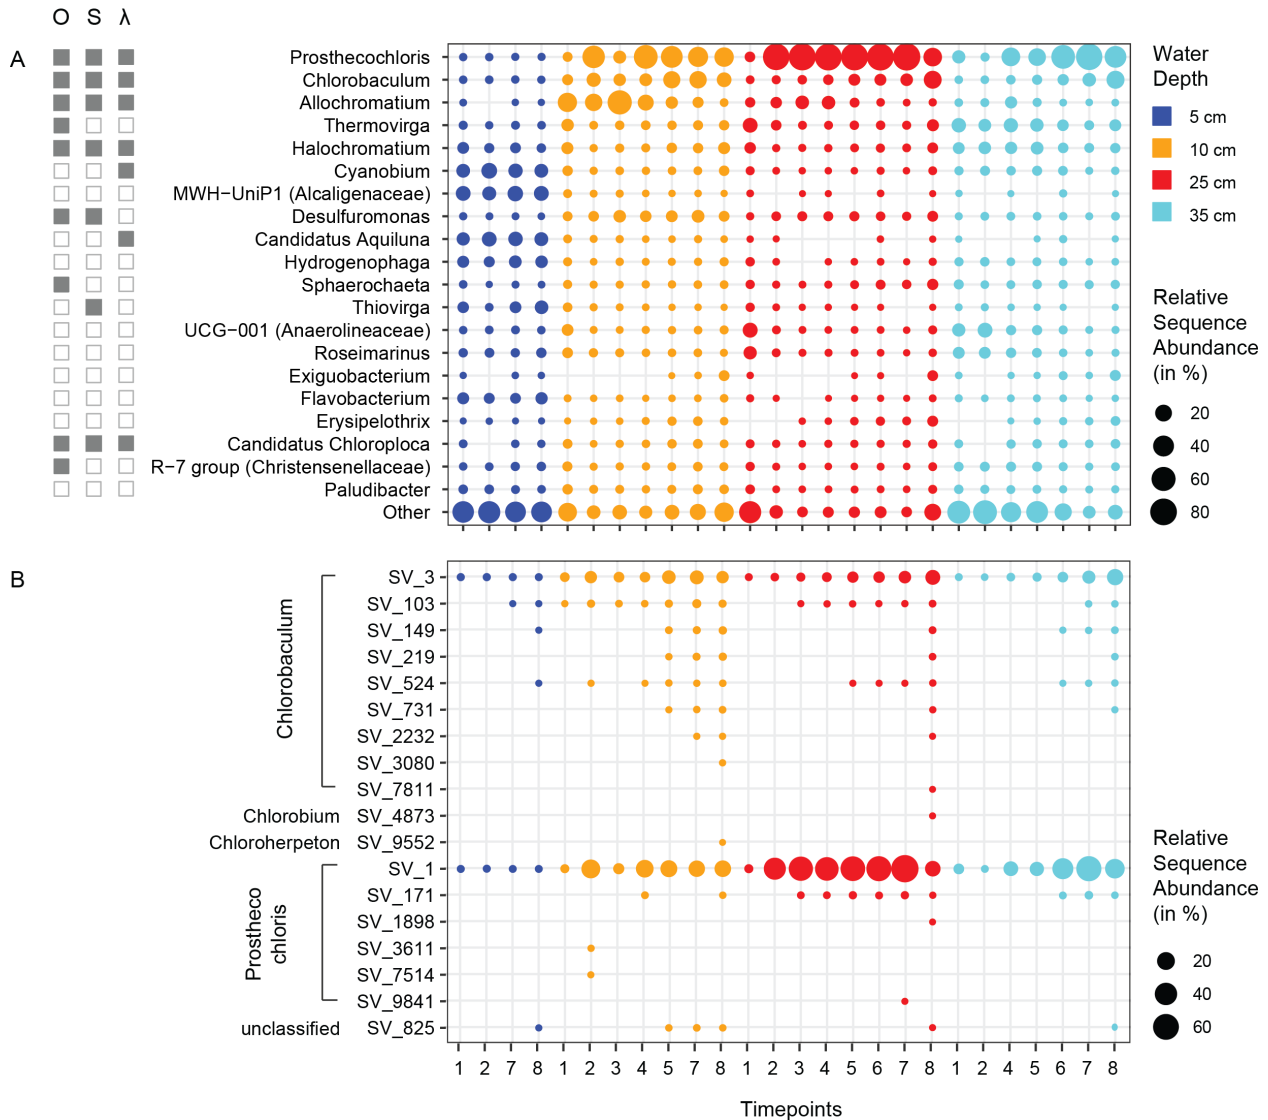

256

257 **Figure 6: Microbial community composition on genus level.** **A:** Relative sequence  
 258 abundance of genera found in different depths (colors) and timepoints (x-axis). Relative  
 259 sequence abundances were averaged across triplicates, due to the high similarity of all three  
 260 experiments. Clades that are anaerobic (O), involved in the sulfur cycle (S), or phototrophic (λ)  
 261 are indicated by full squares. **B:** Relative sequence abundance of amplicon sequence variants  
 262 (ASV) within the order *Chlorobiales*. The graph shows average values of the three replicate  
 263 experiments for clarity. The replicate experiments were very similar (see SI Figure S5 and S6).

264

## 265 Chlorobiales-affiliated metagenome-assembled genomes

266 We calculated the index of replication (iRep) (Brown et al., 2016) of the *Prostheco-*  
267 *chloris* and *Chlorobaculum* populations based on the metagenome-assembled genomes  
268 (MAGs) that were recovered from the community metagenomes of two replicate  
269 experiments (Replicates A, E) and the enrichment culture (SK) at timepoint 7. Both  
270 populations were replicating rapidly. *Prosthecochloris* (bin10) had an iRep value of 3.7  
271 ( $r^2=0.90$ , sample 7A3), which indicates that on average every cell had 2.5 replication  
272 events at the time of sampling. *Chlorobaculum* (bin 6) had iRep values of 2.5 ( $r^2=0.95$ ,  
273 sample 7E3) and 2.8 ( $r^2=0.95$ , sample 7K3), indicating that on average every cell had  
274 ~1.5 replication events. Bin 6 (*Chlorobaculum sp.*) and Bin 10 (*Prosthecochloris sp.*)  
275 contain CRISPR arrays denoted as either type I (*cas3*) or III (*cas10*) CRISPR systems  
276 (Makarova et al., 2015) (Figure S16, S17). CRISPR predictions revealed 3 direct repeat  
277 sequences in both MAGs of 30 and 35 (2) bp in length for Bin 6 and 37, 32, and 33 for  
278 the Bin 10 (Table S4). None of the spacers were shared by the closest reference and  
279 representative genomes or matched sequences in the CRISPR database (Grissa et al.,  
280 2007). However, a highly similar CRISPR array and direct repeat sequence were found  
281 between our Bin 6 and *Chlorobaculum parvum* NCBI8327 with 60% *cas* genes similarity  
282 (Figure S16). The metagenomes of all experiments, as well as of the GSB enrichment  
283 culture contained high relative sequence abundances of viruses affiliating with  
284 *Microviridae* (Figure S18).

## 285 **Discussion**

286 In this study, we mimicked naturally-occurring disturbances in the decaying seagrass  
287 bed of Trunk River to study microbial community succession. We performed triplicate  
288 experiments that showed very similar physicochemical gradients and patterns of  
289 community structure. The observed slight variations between replicate sites were likely  
290 due to differences in the organic matter composition and distance to the lagoon access,  
291 or due to ripples and disturbances caused by weather, animals, and sampling scientists.  
292 The replicated disturbances of the organic matter layers (A-hole, E-hole, and K-hole)  
293 released trapped sulfide and caused the rapid establishment of steep physicochemical  
294 gradients as well as the development of a bloom of sulfide-oxidizing phototrophs. We

295 monitored the community assembly and succession and highlight the ecological niches  
296 of key populations and their possible mechanisms of coexistence.

### 297 Biogeochemistry of the water column

298 The Trunk River lagoon is a brackish estuary approximately on sea level and  
299 characterized by shallow, warm water. It has one small freshwater inlet, and one small  
300 outlet to the sea, resulting in a long residence time and low flow velocity of the water.  
301 The freshwater overlays a saltwater lens creating very a stable salinity gradient from  
302 brackish water at the surface to basically seawater at the sediment surface in 40 cm  
303 water depth (Figure 2), typical of brackish water estuaries (Levinton, 1995). Before the  
304 experiment the pH decreased from mildly basic near the surface (~ pH 9) to around  
305 seawater near the sediments (~ pH 8). After the disturbance the salinity gradient  
306 remained stable over the 15-day sampling period, pH however decreased drastically in  
307 all layers to as low as ~ 6.25 in the bottom layers (Figure 2). This pH decrease is likely  
308 due to hydrogen sulfide and its dissociation from H<sub>2</sub>S to HS<sup>-</sup>. The dissolved oxygen  
309 (DO) concentration also decreased with water depth (Figure 2) being below 20 %  
310 saturation in the bottom layers throughout most of the experiment, thus the bottom layer  
311 being *de facto* anoxic. In addition, DO decreased substantially even in the top layers in  
312 the first half of the experiment, recovering in parallel to the slow collapse of the bloom.  
313 The larger variations in pH and DO at 5 cm and 10 cm as compared to 25 cm and 35  
314 cm indicate that the top layers were the more dynamic part of the water column.  
315 Together, the observations – that were very similar in the replicate experiments - show  
316 that after the system settled from the initial perturbations, it reached a stable state with  
317 stable physicochemical gradients in the stratified water column.

### 318 Indications for a cryptic sulfur cycle in the water column

319 Sulfate concentrations in the bottom layers decreased substantially within the first days,  
320 and were lowest in the bloom layer at 25 cm depth, where sulfate was almost entirely  
321 depleted. We found sulfate-reducers affiliating with *Desulfobacteraceae* and  
322 *Desulfobulbaceae* in the hypoxic layers of the bloom (Figure S8) likely producing sulfide  
323 using either hydrogen or organic acids released from fermented organic matter layers.

324 The sulfide concentrations were highest at the upper boundary of the bloom at 10 cm  
325 water depth after the system stabilized around day 6 (Figure 2). This is unexpected  
326 since reduced sulfur species, especially hydrogen sulfide, are the electron donor for the  
327 green and purple phototrophs and thus should have been depleted in these layers. At  
328 the same time, we found an increased relative abundance of sulfur-reducing  
329 *Desulfuromonas sp.* in the bloom layers, peaking at around 15 % relative sequence  
330 abundance. *Desulfuromonas sp.* are known to live in freshwater ecosystems and  
331 reduce elemental sulfur to sulfide (Finster et al., 1997, 1994; Pfennig and Biebl, 1976),  
332 which in turn can be reused by the sulfide-oxidizing phototrophs. This suggests that  
333 sulfide was replenished by sulfate reducers from sulfate as well as from sulfur reducers  
334 from sulfur produced by the phototrophs indicating a “sulfur loop” in the bloom carried  
335 out by multiple species across several phyla (Figure 7). At early timepoints the microbial  
336 suspension was beige and milky, indicating the presence of large amounts of elemental  
337 sulfur in the sample (Figure S2). Later the samples turned more yellow, due to an  
338 increase in phototrophic organisms and their photopigments (Figure 2, 3), but also  
339 cleared up and became translucent (Figure S2). Taken together this indicates that  
340 *Desulfuromonas sp.* reduced the elemental sulfur that was produced by the anoxygenic  
341 phototrophs so quickly that it was not accumulating in the suspension. This suggested  
342 sulfur loop - potentially a cryptic sulfur cycle depending on the concentration of the  
343 intermediate  $S^0$  - provides a positive feedback that could explain the very rapid  
344 development of the bloom. The involved *Chlorobi* and *Deltaproteobacteria* could even  
345 form tight aggregates to efficiently use the common intermediate similar to  
346 *Chlorochromatium aggregatum* (Wanner et al., 2008), a topic that merits future  
347 research.

#### 348 Assembly and coexistence of phototrophic microorganisms

349 The yellowish layer in the water column (fondly termed “microbial lemonade”, Figure  
350 1C) formed around two to four days post-disturbance and was fully established by day  
351 six. The lemonade layer occurred between 10 – 30 cm water depth (Figure S2) with  
352 highest cell numbers and biomass at around 25 cm water depth (Figure 2, S4) in  
353 brackish, mildly acidic, and hypoxic waters (Figure 2). The microbial lemonade

354 represented a multispecies phototrophic bloom, dominated by green and purple sulfur  
355 bacteria. Due to the relative influence of green and purple sulfur bacteria and their  
356 photopigments, the color of the bloom slightly shifted from yellow-green at early  
357 timepoints to orange at mid timepoints back to yellow-green at late timepoints (Figure  
358 S2). This is reflected by the pigment spectra collected at the different timepoints (Figure  
359 3).

360 Interestingly, the sequencing data suggested that especially the lower layer of the  
361 bloom was dominated by an apparently clonal population of green sulfur bacteria  
362 affiliated with *Prosthecochloris vibrioformis*. The green sulfur bacteria are sulfur-  
363 oxidizing, strictly anaerobic, obligate photoautotrophs (Alexander and Imhoff, 2006).  
364 Yet, based on our oxygen measurements, the Trunk River GSB population apparently  
365 tolerated low oxygen concentrations. The low concentration of dissolved oxygen at 25  
366 cm depth combined with sulfide, salinity, and low light created an optimal habitat for  
367 *Prosthecochloris sp.*

368 Despite the dominance of few populations the disturbance created a habitat with  
369 gradients of pH, salinity, light, oxygen, and sulfide that enabled the coexistence of  
370 multiple phototrophic clades from at least five different phyla (*Actinobacteria*, *Chlorobi*,  
371 *Chloroflexi*, *Cyanobacteria* and *Gammaproteobacteria*). The coexistence of these high  
372 number of organisms competing for the same energy source is due to the different  
373 absorption maxima of each clades' photopigments (Figure 3), need for different electron  
374 donors, and the varying salinity and oxygen tolerances of each clade. *P. vibrioformis* is  
375 absent at 5 cm and present only in low abundance at 10 cm. The surface layer (5 cm  
376 depth) is inhabited by oxygenic phototrophic *Cyanobacteria* affiliating with *Cyanobium*,  
377 while the upper layer of the bloom (10 cm depth) is dominated by purple sulfur bacteria  
378 of the order *Chromatiales* (Figure 6). Because *Prosthecochloris* are adapted to low light  
379 conditions (Findlay et al., 2015) and respond to different wavelengths of light than  
380 *Cyanobacteria* and photosynthetic *Proteobacteria* (Herbert and Tanner, 1977; Parkin  
381 and Brock, 1980), it is reasonable that they thrived at depths of 25 cm, where they can  
382 out-compete other phototrophs. *Prosthecochloris* have been previously observed in  
383 many marine and saline habitats, such as the Black Sea (Manske et al., 2005), Baltic



384 Sea, Sippewissett Salt Marsh, and Badwater basin (Alexander and Imhoff, 2006). They  
385 are considered to belong to a specialized phylogenetic lineage of green sulfur bacteria  
386 adapted for marine and salt water ecosystems. Blooms of *P. vibrioformis* have been  
387 previously observed in stratified lakes, where they dominate the community at a specific  
388 depth (Máthé et al., 2014), sometimes forming clonal blooms (Gregersen et al., 2009).

389 Remarkably, the suspended phototrophic bloom was spatially organized analogous to  
390 benthic phototrophic mats in the nearby Sippewissett Salt Marsh (Armitage et al., 2012;  
391 Nicholson et al., 1987; Pierson et al., 1987) and elsewhere (Bolhuis et al., 2014; Bolhuis  
392 and Stal, 2011). The layers of phototrophic mats are dominated from top, middle to  
393 bottom by *Cyanobacteria*, PSB and GSB, respectively, except on a scale of few  
394 millimeters to centimeters. Thus, the disturbance experiment that we performed *in situ*  
395 created a transient ecosystem with niches resembling those in coastal microbial mats,  
396 except across a spatial scale that was one order of magnitude greater. The community  
397 slowly collapsed after about two weeks and the water column seemed to return to its  
398 original state (Figure 5). We did not observe a shift from phototrophic to chemotrophic  
399 sulfur oxidation after the phototrophic bloom (Pjevac et al., 2015).

#### 400 New species of purple and green sulfur bacteria and possible viral predation

401 Due to the findings of a previous study based on 16S rRNA gene libraries, Imhoff and  
402 colleagues proposed the existence of several uncultivated GSB species in Sippewissett  
403 Salt Marsh and other estuaries (Alexander and Imhoff, 2006). The authors provide  
404 evidence that several GSB clades harbor species that have yet escaped isolation,  
405 among those are species in the genera *Chlorobaculum* and *Prosthecochloris*. We have  
406 strong evidence that we found at least two of these species based on our MAGs of a  
407 *Chlorobaculum* species (Bin 6, Figure S12, S14) and a *Prosthecochloris* species (Bin  
408 10, Figure S12, S15). Both MAGs cluster sufficiently far away from the closest cultured  
409 species (Figure S11, S13) and have average nucleotide identity (ANI) values of <90 to  
410 their respective closest cultured isolate. Both MAGs also contain CRISPR-Cas systems  
411 that are very different from the cultured isolates (Figure S16, S17). Our CRISPR results  
412 show that Trunk River populations may be under predatory stress, affecting the  
413 abundance of bacterial blooms, and that host immunity is active in this ecosystem

414 (Llorens-Marès et al., 2017). The unique CRISPR arrays indicate that closely related  
415 species may be infected by different viruses with species specificity (Borton et al.,  
416 2018). However, some viral populations have been reported to have broad host ranges  
417 (Daly et al., 2019). Divergent evolution or strain level microdiversity may also explain  
418 distinct CRISPR-Cas systems (Daly et al., 2016). A lack of public databases containing  
419 viral sequences restricts the detection of viral-host interactions (Goodcare et al., 2018).  
420 While Llorens-Marès *et al.* (2017) characterized a potential green sulfur bacterial viral  
421 infection, to date, phages infecting *Chlorobi* have not been reported. Our analyses  
422 suggest that viruses of the family *Microviridae* played a major role in the transient bloom  
423 (Figure S17), possibly even for its demise. This interesting finding merits future research  
424 on transient phototrophic blooms in estuarine ecosystems.

425

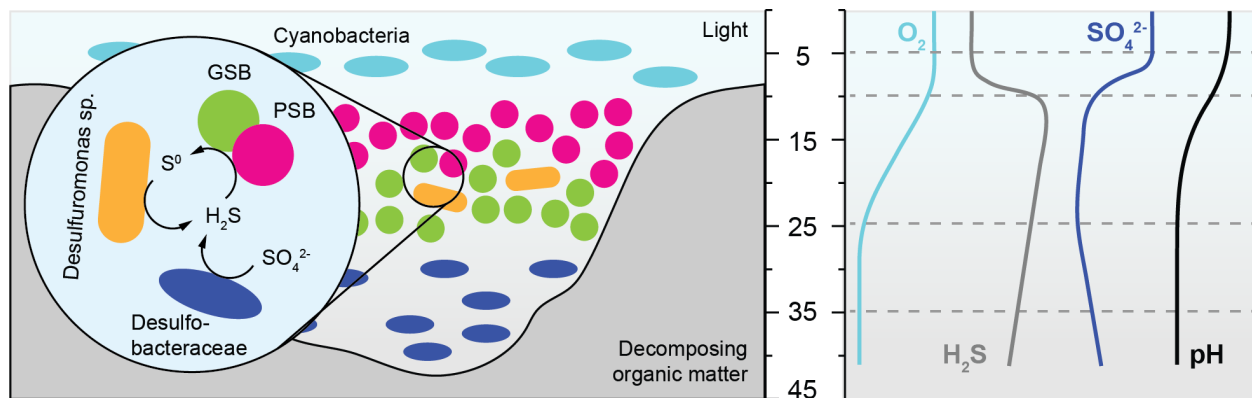

426

427 **Figure 7: Ecosystem sketch.** Schematic overview of the phototrophic bloom showing the main  
428 phototrophic populations, sulfur compounds, and chemical gradients.

429

## 430 Conclusions

431 In this study, we mimicked phototrophic blooms that naturally occur in a brackish  
432 estuarine ecosystem to understand the underlying microbial and biogeochemical  
433 dynamics. We suggest that phototrophs of different phyla co-exist in a layered bloom  
434 based on their different light and oxygen requirements, analogous to the communities in  
435 phototrophic microbial mats (Figure 7). Our findings indicate that Chlorobiaceae form a  
436 syntrophic relationship with *Desulfuromonas* sp. with elemental sulfur as intermediate.

437 We reconstructed metagenome assembled genomes of two uncultured green sulfur  
438 bacteria, belonging to *Chlorobaculum* and *Prosthecochloris* and show that *Microviridae*  
439 viruses played a role in the bloom, potentially infecting species within the *Chlorobiales*.

440

## 441 **Materials and Methods**

### 442 Experimental Setup and Sample Collection

443 We used custom-made sampling poles for long-term environmental monitoring of the  
444 water column without disturbing the established gradients (LEMON; Figure 1B, C). The  
445 sampling poles were placed in three replicate depressions (A-hole, E-hole, and K-hole)  
446 that we dug into the thick layers of decaying organic matter (Figure 1A). In each of sites,  
447 a sampling pole was placed such that the inlets sampled water at 5 cm, 10 cm, 25 cm,  
448 and 35 cm depth below the surface (Figure 1B, C). Sampling poles were set up one day  
449 after the holes were dug out and sampling began one day after set up (two days post  
450 disturbance), to allow disturbed sediment to settle. Samples were collected over a 15-  
451 day period during July-August 2015. For each sample, the first 5 ml were discarded,  
452 followed by collection of 100 ml of water in several sterile tubes for further analyses  
453 (Figure S2). The tubes were transported on ice to the laboratory and stored at 4°C. All  
454 sample collections were carried out between 4 pm and 6 pm.

### 455 Enrichment cultures

456 To enrich for GSB we used a defined saltwater medium (400g/l NaCl, 60g/l  
457 MgCl<sub>2</sub>\*6H<sub>2</sub>O, 3g/l CaCl<sub>2</sub>\*2H<sub>2</sub>O, 10g/l KCl) buffered at pH 7.2 with 5 mM MOPS. The  
458 medium contained 5 mM NH<sub>4</sub>Cl as N source, 1mM K phosphate (pH 7.2) as P source,  
459 70 mM NaHCO<sub>3</sub> as C source, 10 mM Na<sub>2</sub>S<sub>2</sub>O<sub>3</sub> as electron donor, 1 mM Na<sub>2</sub>S as  
460 reductant or electron donor, a multivitamin solution prepared at 1000× in 10 mM MOPS  
461 at pH 7.2, and a trace metal solution prepared at 1000× in 20 mM HCl. Saltwater base,  
462 MOPS, N- and P-source, and trace metals were autoclaved together in a Widdel  
463 sparging flask, cooled under a stream of N<sub>2</sub>/CO<sub>2</sub> (80%:20%) gas. C-source, electron  
464 donors and vitamins were added from filter-sterilized stock solutions after cooling. The

465 medium was inoculated with biomass removed from *in situ* enrichments of GSB grown  
466 on glass slides using a 770 nm monochromatic LED. After inoculation, the bottle was  
467 kept in dark for 2-4 hours and then placed 5 cm away from a LED light source with the  
468 same specifications. After a visible sign of growth – green coloration – the culture was  
469 filtered through 0.2  $\mu\text{m}$  filter and used for DNA extraction, similar to other samples.

470

## 471 Physicochemical Measurements

472 *In-situ* measurements of pH, temperature, dissolved oxygen, oxidation reduction  
473 potential (ORP), and ion selective electrode (ISE) were carried out with a multi-  
474 parameter probe equipped with a quarto probe (YSI Professional Series Model Pro).  
475 The probe was calibrated for pH with 4, 7, and 10 buffers and for dissolved oxygen  
476 using oxygen-saturated water and an anoxic solution of sodium ascorbate and sodium  
477 hydroxide. After each sample collection the probe was lowered into the water to each  
478 depth per site and after probe readings stabilized, the parameters were recorded.

479 To measure biomass and pigment spectra, up to 10 ml of the collected sample was  
480 filtered through a sterile Millipore filter (0.2  $\mu\text{m}$  GTTP, 0.2  $\mu\text{m}$  GNWP, or 0.22  $\mu\text{m}$  GV).  
481 Filtrates were washed twice with ammonium acetate solutions with the same ionic  
482 strength as each depth. The filters were placed on aluminum foil, dried at 60°C  
483 overnight and subsequently weighed (Figure S3). A Spectral Evolution SR1900  
484 spectrophotometer was used to measure the spectrum of the dried biomass on each  
485 filter with a scanning range of 350-1900 nm. The light source was a Dyonics 60 W lamp.

486 After sterile filtration, the filtrate was used to measure anion, cation, and organic acid  
487 concentrations using an ion chromatographer. The ion concentrations of samples were  
488 measured by diluting filtrate 1:10 with Millipore water to a total volume of 2 ml. The  
489 diluted samples were measured in triplicate using a ThermoFisher/Dionex ICS2100  
490 equipped with an AS18 column using a 13 minute, 33 mM NaOH isocratic program to  
491 measure anions and a CS12A column using a 13 minute, 25 mM methane sulfonic acid  
492 isocratic program to measure cations. Samples for organic acid analysis were filtered  
493 through 0.2  $\mu\text{m}$  filters and 900  $\mu\text{L}$  of filtrate was added to 100  $\mu\text{L}$  of 5 M  $\text{H}_2\text{SO}_4$  to

494 precipitate any compounds that might do so on the column. The samples were  
495 centrifuged and the upper portion was removed for HPLC analysis. Samples were  
496 analyzed on a BioRad Aminex HPX-87H column in isocratic elution mode with 5 mM  
497 sulfuric acid.

498 Iron concentration was quantified using the ferrozine assay (Stookey, 1970). 4.5 ml  
499 filtrate were added on site to 0.5 ml of 1 M HCl to prevent oxidation of any available  
500 Fe(III). For Fe(II), 50  $\mu$ l filtrate was added to 50  $\mu$ l of 1M HCl and 100  $\mu$ l of ferrozine  
501 (0.1% [wt/vol] in 50% ammonium acetate) was added. For total iron, 50  $\mu$ l filtrate was  
502 added to 50  $\mu$ l of 10% hydroxylamine hydrochloride in 1M HCl to reduce Fe(III) to Fe(II).  
503 Samples were added to 100  $\mu$ l of ferrozine. All samples were incubated for 15 min and  
504 a filtrates Absorbances were read in triplicate at 560 nm using a Promega plate reader.  
505 Ferrous ammonium sulfate was used as standard.

506 Sulfide concentrations were quantified using the Cline assay (Cline, 1969). 1.5 ml filtrate  
507 were added on site to 500  $\mu$ l of zinc acetate solution (91 mM) to prevent oxidation of the  
508 sulfide. Cline reagent (N, N-dimethyl-p-phenylenediamine sulfate, H<sub>2</sub>SO<sub>4</sub>,  
509 NH<sub>4</sub>Fe(SO<sub>4</sub>)<sub>2</sub>·12 H<sub>2</sub>O) was added, the samples were incubated in the dark for 30  
510 minutes and absorbance was read at 665 nm.

#### 511 DNA Extraction, Library Preparations, and Sequencing

512 Within 2 – 6 hours of sample collection, 50 ml sample was filtered using an autoclaved  
513 0.2  $\mu$ m polycarbonate filter (GTP Millipore) and stored at -20°C. Each filter was cut  
514 with a sterile blade and extracted with the MoBio PowerFecal kit. We followed the  
515 protocol, but instead of bead beating, the samples were twice vortexed horizontally with  
516 the beads (10 min and 20 min with a 10 min pause). DNA concentration and purity were  
517 measured with Nanodrop and Promega Qubit fluorometer and Nanodrop, respectively.

518 We prepared 16S rRNA gene amplicon library using V4-V5 fusion primers as previously  
519 described (Morrison et al., 2013). Briefly, the fusion primer contains TruSeq adapter  
520 sequences, barcodes, and the forward or reverse 16S rRNA gene primers. The forward  
521 and reverse 16S rRNA gene primers were 518F (CCAGCAGCYGCGGTAAN) and 926R  
522 (CCGTCAATTCNTTTRAGT). The PCR conditions were as follows: initial denaturation

523 of 94°C for 3 min, 30 cycles of denaturation at 94°C for 30 s, annealing at 57°C for 45 s,  
524 extension at 72°C for 1 min, and final extension at 72°C for 2 min. The libraries were  
525 cleaned using Agencourt Ampure XP beads, quantified using picogreen, pooled in  
526 equimolar ratios, and cleaned again using Agencourt Ampure XP beads a second time.  
527 The indexed libraries were then sequenced on the Illumina MiSeq PE250 platform.

528 The DNA from the depth of 25 cm from timepoint 7 from the three replicates, as well as  
529 from a phototrophic enrichment were used to generate whole-genome shotgun  
530 metagenomic library. The DNA was sheered using Covaris sonicator, size selected for  
531 500-600bp using Pippin prep, and cleaned using Agencourt Ampure XP clean beads.  
532 The cleaned DNA was analyzed using Bioanalyzer DNA1000 chip and amplified using  
533 random hexamer primers with KAPA polymerase for 10-12 cycles. Amplified DNA was  
534 cleaned using Agencourt Ampure XP clean beads and used to prepare metagenomic  
535 library using Nugen Ovation ultralow DR multiplex kit with manufacture supplied  
536 protocol. The libraries were then sequenced on Illumina MiSeq PE250 platform. All the  
537 sequencing was performed at the Keck facility at the J. Bay Paul Center at the Marine  
538 Biological Laboratory, Woods Hole, MA.

### 539 Amplicon Sequence Data Analyses

540 The amplicon data was demultiplexed in mothur v1.39.5 (Schloss et al., 2009), followed  
541 by the trimming of 16S rRNA gene amplification primers using Cutadapt v1.16 (Martin,  
542 2011) with default parameters. The primer-trimmed amplicon sequencing data was  
543 quality checked using DADA2 v1.9.0 R Package (Callahan et al., 2016). In DADA2, the  
544 reads were trimmed at the first instance of quality drop below 8, an expected error rate  
545 of 2, followed by trimming to 220bp and 200bp for forward and reverse reads. Any reads  
546 that matched PhiX or had an ambiguous base were removed. An error profile for the  
547 forward and reverse reads was generated using learnErrors function and then used to  
548 merge the forward and reverse reads using the mergePairs function. The merged reads  
549 were used to generate the amplicon sequence variants using makeSequenceTable  
550 function, which was then filtered for chimeras using removeBimeraDenovo function. The  
551 amplicon sequence variants were assigned taxonomy in DADA2 using Silva reference  
552 database v132 (Quast et al., 2013). Community analyses were performed using a

553 custom workflow based on R and the packages vegan, labdsv, tidyverse (stringr, dplyr,  
554 ggplot2), UpSetR and custom scripts (Conway et al., 2017; Oksanen et al., 2012;  
555 Roberts, 2012; Wickham, 2018, 2009; Wickham et al., 2018) for details see. Relative  
556 abundance of bacterial ASV (amplicon sequence variants), Bray-Curtis dissimilarities,  
557 Nonmetric Multidimensional Scaling as well as analyses determining Singletons and  
558 percent shared ASVs are based on the unaltered Sample×ASV table as calculated by  
559 DADA2. To compare the diversity between samples using the number of observed  
560 species, Shannon index, Inverse Simpson diversity and Chao1 Richness (Hill et al.,  
561 2003) the ASV abundance tables were rarefied to account for unequal sampling effort  
562 using 31,682 randomly chosen sequences without replacement. For details refer to the  
563 R workflow available at the public database PANGAEA  
564 (<https://issues.pangaea.de/browse/PDI-20394>). Note: This link is inactive until the  
565 submitted data are processed and public.

#### 566 Metagenomic Sequence Data Analyses

567 Quality control of the raw reads was performed using Preprocessing and Information of  
568 SEquence data (PRINSEQ) to remove sequencing tags and sequences with mean  
569 quality score lower than 25, duplicates and N's (Schmieder and Edwards, 2011). All  
570 runs combined provided a total of approximately 3.5 million 250 bp read pairs. All  
571 forward and reverse reads were placed together in one file and cross co-assembled  
572 using SPAdes using the --meta option (Bankevich et al., 2012). Binning was performed  
573 using MetaBAT (Kang et al., 2015) and Anvi'o (v5.2) metagenomic workflow  
574 (CONCOCT) (Eren et al., 2015). Completeness and contamination of bins was  
575 assessed using CheckM (Parks et al., 2015). Assembled genomes that contained more  
576 than 90% genome completeness, less than 5% contamination, and sequences mainly  
577 from a single genus were further analyzed. This yielded two high quality bacterial  
578 metagenome-assembled genomes (MAGs): Bin 6 and Bin 10. Taxonomic composition  
579 for each bin was predicted using FOCUS (Silva et al., 2014). Phylogenetic analysis  
580 including the identification of their closest phylogenetic neighbors was investigated  
581 using PATRIC Comprehensive Genome Analysis (Wattam et al., 2017).  
582 CRISPRCasFinder (Couvin et al., 2018) and CRISPRone (Zhang and Ye, 2017) were

583 used to identify CRISPR repeat and spacer sequences. The quality checked reads from  
584 each sample were mapped to the MAGs, Bin 6 and Bin 10 using bowtie2 (Langmead  
585 and Salzberg, 2012). The mapped reads were then analyzed using iRep (Brown et al.,  
586 2016) to estimate replication events in Bin 6 and Bin 10. Unassembled sequences were  
587 processed on the MG-RAST platform version 4.0.3. Percent abundance of viral  
588 sequences was calculated from the RefSeq database using an e-value cutoff of 1e-5, a  
589 minimum identity cutoff of 60%, and an alignment length minimum cutoff of 15 (Meyer et  
590 al., 2008). For details refer to the metagenome analyses workflow publicly accessible at  
591 HackMD (<https://hackmd.io/tGZyCM9sSNmuorpHenQVNA>).

### 592 Availability of data and material

593 The genomic datasets generated and analyzed during the current study are available on  
594 MG-RAST (Project Name: Trunk River, ID: 4837589.3 (sample SK), 4837590.3 (sample  
595 7K3), 4837591.3 (sample 7E3), 4837592.3 (sample 7A3)) and metagenome-assembled  
596 genomes workflow are available on HackMD  
597 (<https://hackmd.io/tGZyCM9sSNmuorpHenQVNA>). The raw 16S rRNA amplicon data,  
598 the shotgun metagenomic data, the 16S rRNA gene clonal sequences, and the  
599 metagenome assembled genomes presented in this work are publicly archived in NCBI  
600 under Bioproject PRJNA530984 (<https://www.ncbi.nlm.nih.gov/bioproject/530984>). The  
601 contextual datasets generated and analyzed during the current study are publicly  
602 available at PANGAEA under accession XXX (weblink).

### 603 Funding

604 This work was carried out at the Microbial Diversity summer course at the Marine  
605 Biological Laboratory in Woods Hole, MA. The course was supported by grants from  
606 National Aeronautics and Space Administration, the US Department of Energy, the  
607 Simons Foundation, the Beckman Foundation, and the Agouron Institute.

608

### 609 Competing interests



610 The authors declare that they have no competing interests.

611 Authors' contributions

612 SB helped design the study, collected samples, prepared and analyzed sequencing  
613 data, wrote manuscript

614 ESC helped design the study, collected samples, prepared and analyzed  
615 physicochemical data, wrote manuscript

616 SHK helped design the study and enrichment cultures, analyzed physicochemical data  
617 and pigment spectra, wrote manuscript

618 SPC analyzed metagenomic data, wrote manuscript

619 SK obtained enrichment culture, wrote manuscript

620 SD helped design the study, wrote manuscript

621 KH collected samples, prepared and analyzed physicochemical data and pigment  
622 spectra, wrote manuscript

623 SER designed the study, analyzed and visualized sequencing and physicochemical  
624 data, wrote manuscript with input from all co-authors

625 All authors read and approved the final manuscript.

626 **Acknowledgements**

627 We would like to express our deepest gratitude towards Dianne Newman and Jared R.  
628 Leadbetter, directors of the Microbial Diversity Summer Course at the Marine Biological  
629 Laboratory 2014-2017. Without their trust, support and encouragement the project  
630 would not have been realized. We are very grateful to Joseph Vinneis, Kim Finnegan,  
631 and Mitchell Sogin for providing laboratory space, equipment, and guidance regarding  
632 next-generation sequencing. We are also very grateful to the students and staff of the  
633 2015 Microbial Diversity Summer Course, specifically Kurt Dahlstrom, Kristina Garcia,  
634 Jessica Choi, Rachel Soble, and Lina Bird. We would like to thank the Simons  
635 Foundation, NSF, DOE, and NASA for funding the Microbial Diversity Summer course,

636 as well as Promega, Thermo Fisher Scientific, Spectral Evolution, and MBL's Marine  
637 Resources Center for providing reagents and equipment used in this work.

638

## 639 **References**

640 Alexander B, Imhoff JF. 2006. Communities of green sulfur bacteria in marine and  
641 saline habitats analyzed by gene sequences of 16S rRNA and Fenna-Matthews-  
642 Olson protein. *Int Microbiol* **9**:259–266.

643 Allen GP, Salomon JC, Bassoullet P, Du Penhoat Y, de Grandpré C. 1980. Effects of  
644 tides on mixing and suspended sediment transport in macrotidal estuaries.  
645 *Sediment Geol* **26**:69–90. doi:10.1016/0037-0738(80)90006-8

646 Armitage DW, Gallagher KL, Youngblut ND, Buckley DH, Zinder SH. 2012. Millimeter-  
647 scale patterns of phylogenetic and trait diversity in a salt marsh microbial mat. *Front*  
648 *Microbiol* **3**:293. doi:10.3389/fmicb.2012.00293

649 Badr E-SA, Tappin AD, Achterberg EP. 2008. Distributions and seasonal variability of  
650 dissolved organic nitrogen in two estuaries in SW England. *Mar Chem* **110**:153–  
651 164. doi:http://dx.doi.org/10.1016/j.marchem.2008.04.007

652 Bankevich A, Nurk S, Antipov D, Gurevich A a., Dvorkin M, Kulikov AS, Lesin VM,  
653 Nikolenko SI, Pham S, Pribelski AD, Pyshkin A V., Sirotkin A V., Vyahhi N, Tesler  
654 G, Alekseyev M a., Pevzner P a. 2012. SPAdes: A New Genome Assembly  
655 Algorithm and Its Applications to Single-Cell Sequencing. *J Comput Biol* **19**:455–  
656 477. doi:10.1089/cmb.2012.0021

657 Bernhard AE, Colbert D, McManus J, Field KG. 2005. Microbial community dynamics  
658 based on 16S rRNA gene profiles in a Pacific Northwest estuary and its tributaries.  
659 *FEMS Microbiol Ecol* **52**:115–128. doi:10.1016/j.femsec.2004.10.016

660 Bolhuis H, Cretoiu MS, Stal LJ. 2014. Molecular ecology of microbial mats. *FEMS*  
661 *Microbiol Ecol* **90**:335–350. doi:10.1111/1574-6941.12408

662 Bolhuis H, Stal LJ. 2011. Analysis of bacterial and archaeal diversity in coastal microbial  
663 mats using massive parallel 16S rRNA gene tag sequencing. *ISME J* **5**:1701–1712.

664 Borrego CM, Gerola PD, Miller M, Cox RP. 1999. Light intensity effects on pigment  
665 composition and organisation in the green sulfur bacterium *Chlorobium tepidum*.  
666 *Photosynth Res* **59**:159–166. doi:10.1023/A:1006161302838

667 Borton MA, Daly RA, O'Banion B, Hoyt DW, Marcus DN, Welch S, Hastings SS, Meulia  
668 T, Wolfe RA, Booker AE, Sharma S, Cole DR, Wunch K, Moore JD, Darrah TH,  
669 Wilkins MJ, Wrighton KC. 2018. Comparative genomics and physiology of the  
670 genus *Methanohalophilus*, a prevalent methanogen in hydraulically fractured

- 671 shale. *Environ Microbiol* **20**:4596–4611. doi:10.1111/1462-2920.14467
- 672 Boschker HTS, Vasquez-Cardenas D, Bolhuis H, Moerdijk-Poortvliet TWC, Moodley L.  
673 2014. Chemoautotrophic Carbon Fixation Rates and Active Bacterial Communities  
674 in Intertidal Marine Sediments. *PLoS One* **9**:e101443.  
675 doi:10.1371/journal.pone.0101443
- 676 Brown CT, Olm MR, Thomas BC, Banfield JF. 2016. Measurement of bacterial  
677 replication rates in microbial communities. *Nat Biotechnol* **34**:1256–1263.  
678 doi:10.1038/nbt.3704
- 679 Callahan BJ, McMurdie PJ, Rosen MJ, Han AW, Johnson AJA, Holmes SP. 2016.  
680 DADA2: High-resolution sample inference from Illumina amplicon data. *Nat*  
681 *Methods* **13**:581–583.
- 682 Capone DG, Kiene RP. 1988. Comparison of microbial dynamics in marine and  
683 freshwater sediments: contrasts in anaerobic carbon catabolism. *Limnol Oceanogr*  
684 **33**:725–749.
- 685 Caumette P, Imhoff JF, Süling J, Matheron R. 1997. *Chromatium glycolicum* sp. nov., a  
686 moderately halophilic purple sulfur bacterium that uses glycolate as substrate. *Arch*  
687 *Microbiol* **167**:11–18. doi:10.1007/s002030050410
- 688 Cline JD. 1969. Spectrophotometric determination of hydrogen sulfide in natural waters.  
689 *Limnol Oceanogr* **14**:454–458.
- 690 Conway JR, Lex A, Gehlenborg N. 2017. UpSetR: An R Package For The Visualization  
691 Of Intersecting Sets And Their Properties. *bioRxiv*.
- 692 Couvin D, Bernheim A, Toffano-Nioche C, Touchon M, Michalik J, Néron B, Rocha  
693 EPC, Vergnaud G, Gautheret D, Pourcel C. 2018. CRISPRCasFinder, an update of  
694 CRISPRFinder, includes a portable version, enhanced performance and integrates  
695 search for Cas proteins. *Nucleic Acids Res* **46**:W246–W251.  
696 doi:10.1093/nar/gky425
- 697 Daly RA, Borton MA, Wilkins MJ, Hoyt DW, Kountz DJ, Wolfe RA, Welch SA, Marcus  
698 DN, Trexler R V, MacRae JD, Krzycki JA, Cole DR, Mouser PJ, Wrighton KC.  
699 2016. Microbial metabolisms in a 2.5-km-deep ecosystem created by hydraulic  
700 fracturing in shales. *Nat Microbiol* **1**:16146.
- 701 Daly RA, Roux S, Borton MA, Morgan DM, Johnston MD, Booker AE, Hoyt DW, Meulia  
702 T, Wolfe RA, Hanson AJ, Mouser PJ, Moore JD, Wunch K, Sullivan MB, Wrighton  
703 KC, Wilkins MJ. 2019. Viruses control dominant bacteria colonizing the terrestrial  
704 deep biosphere after hydraulic fracturing. *Nat Microbiol* **4**:352–361.  
705 doi:10.1038/s41564-018-0312-6
- 706 Eren AM, Esen ÖC, Quince C, Vineis JH, Morrison HG, Sogin ML, Delmont TO. 2015.  
707 Anvi'o: an advanced analysis and visualization platform for 'omics data. *PeerJ*  
708 **3**:e1319. doi:10.7717/peerj.1319

- 709 Findlay AJ, Bennett AJ, Hanson TE, Luther GW. 2015. Light-Dependent Sulfide  
710 Oxidation in the Anoxic Zone of the Chesapeake Bay Can Be Explained by Small  
711 Populations of Phototrophic Bacteria. *Appl Environ Microbiol* **81**:7560–7569.  
712 doi:10.1128/aem.02062-15
- 713 Finster K, Bak F, Pfennig N. 1994. *Desulfuromonas acetexigens* sp. nov., a  
714 dissimilatory sulfur-reducing eubacterium from anoxic freshwater sediments. *Arch*  
715 *Microbiol* **161**:328–332. doi:10.1007/BF00303588
- 716 Finster K, Coates JD, Liesack W, Pfennig N. 1997. *Desulfuromonas thiophila* sp. nov.,  
717 a New Obligately Sulfur-Reducing Bacterium from Anoxic Freshwater Sediment. *Int*  
718 *J Syst Bacteriol* **754**–758. doi:10.1099/00207713-47-3-754
- 719 Garvine RW. 1985. A simple model of estuarine subtidal fluctuations forced by local and  
720 remote wind stress. *J Geophys Res* **90**:11945–11948.  
721 doi:10.1029/JC090iC06p11945
- 722 Goodcare N, Aljanahi A, Nandakumar S, Mikailov M, Khan AS. 2018. A Reference Viral  
723 Database (RVDB) To Enhance Bioinformatics Analysis of High-Throughput  
724 Sequencing for Novel Virus Detection. *mSphere* **3**:1–18.  
725 doi:10.1128/mspheredirect.00069-18
- 726 Gregersen LH, Habicht KS, Peduzzi S, Tonolla M, Canfield DE, Miller M, Cox RP,  
727 Frigaard N-U. 2009. Dominance of a clonal green sulfur bacterial population in a  
728 stratified lake. *FEMS Microbiol Ecol* **70**:30–41. doi:10.1111/j.1574-  
729 6941.2009.00737.x
- 730 Grissa I, Vergnaud G, Pourcel C. 2007. The CRISPRdb database and tools to display  
731 CRISPRs and to generate dictionaries of spacers and repeats. *BMC Bioinformatics*  
732 **8**:1–10. doi:10.1186/1471-2105-8-172
- 733 Haas LW. 1977. The effect of the spring-neap tidal cycle on the vertical salinity structure  
734 of the James, York and Rappahannock Rivers, Virginia, U.S.A. *Estuar Coast Mar*  
735 *Sci* **5**:485–496. doi:http://dx.doi.org/10.1016/0302-3524(77)90096-2
- 736 Henriques IS, Alves A, Tacão M, Almeida A, Cunha Â, Correia A. 2006. Seasonal and  
737 spatial variability of free-living bacterial community composition along an estuarine  
738 gradient (Ria de Aveiro, Portugal). *Estuar Coast Shelf Sci* **68**:139–148.  
739 doi:http://dx.doi.org/10.1016/j.ecss.2006.01.015
- 740 Herbert RA, Tanner AC. 1977. The Isolation and Some Characteristics of  
741 Photosynthetic Bacteria (Chromatiaceae and Chlorobiaceae) from Antarctic Marine  
742 Sediments. *J Appl Bacteriol* **43**:437–445. doi:10.1111/j.1365-2672.1977.tb00770.x
- 743 Hill TCJ, Walsh KA, Harris JA, Moffett BF. 2003. Using ecological diversity measures  
744 with bacterial communities. *FEMS Microbiol Ecol* **43**:1–11.
- 745 Jay DA, Orton PM, Chisholm T, Wilson DJ, Fain AM V. 2007. Particle trapping in  
746 stratified estuaries: Application to observations. *Estuaries and Coasts* **30**:1106–

- 747 1125. doi:10.1007/BF02841400
- 748 Jørgensen BB, Revsbech NP. 1983. Colorless Sulfur Bacteria, *Beggiatoa* spp. and  
749 *Thiovulum* spp., in O<sub>2</sub> and H<sub>2</sub>S Microgradients. *Appl Environ Microbiol* **45**:1261–  
750 1270.
- 751 Kang DD, Froula J, Egan R, Wang Z. 2015. MetaBAT, an efficient tool for accurately  
752 reconstructing single genomes from complex microbial communities. *PeerJ*  
753 **3**:e1165. doi:10.7717/peerj.1165
- 754 Langmead B, Salzberg SL. 2012. Fast gapped-read alignment with Bowtie 2. *Nat*  
755 *Methods* **9**:357.
- 756 Lee DY, Owens MS, Doherty M, Eggleston EM, Hewson I, Crump BC, Cornwell JC.  
757 2015. The Effects of Oxygen Transition on Community Respiration and Potential  
758 Chemoautotrophic Production in a Seasonally Stratified Anoxic Estuary. *Estuaries*  
759 *and Coasts* **38**:104–117. doi:10.1007/s12237-014-9803-8
- 760 Levinton JS. 1995. Marine biology: function, biodiversity, ecology. Oxford University  
761 Press New York.
- 762 Llorens-Marès T, Liu Z, Allen LZ, Rusch DB, Craig MT, Dupont CL, Bryant DA,  
763 Casamayor EO. 2017. Speciation and ecological success in dimly lit waters:  
764 Horizontal gene transfer in a green sulfur bacteria bloom unveiled by metagenomic  
765 assembly. *ISME J* **11**:201–211. doi:10.1038/ismej.2016.93
- 766 Long RR. 1976. Mass and salt transfers and halocline depths in an estuary. *Tellus*  
767 **28**:460–472. doi:10.1111/j.2153-3490.1976.tb00695.x
- 768 Lv X, Ma B, Yu J, Chang SX, Xu J, Li Y, Wang G, Han G, Bo G, Chu X. 2016. Bacterial  
769 community structure and function shift along a successional series of tidal flats in  
770 the Yellow River Delta. *Sci Rep* **6**:36550. doi:10.1038/srep36550  
771 <https://www.nature.com/articles/srep36550#supplementary-information>
- 772 Maie N, Boyer JN, Yang C, Jaffé R. 2006. Spatial, geomorphological, and seasonal  
773 variability of CDOM in estuaries of the Florida Coastal Everglades. *Hydrobiologia*  
774 **569**:135–150. doi:10.1007/s10750-006-0128-x
- 775 Makarova KS, Wolf YI, Alkhnbashi OS, Costa F, Shah SA, Saunders SJ, Barrangou R,  
776 Brouns SJJ, Charpentier E, Haft DH, Horvath P, Moineau S, Mojica FJM, Terns  
777 RM, Terns MP, White MF, Yakunin AF, Garrett RA, Van Der Oost J, Backofen R,  
778 Koonin E V. 2015. An updated evolutionary classification of CRISPR-Cas systems.  
779 *Nat Rev Microbiol* **13**:722–736. doi:10.1038/nrmicro3569
- 780 Manske AK, Glaeser J, Kuypers MMM, Overmann J. 2005. Physiology and Phylogeny  
781 of Green Sulfur Bacteria Forming a Monospecific Phototrophic Assemblage at a  
782 Depth of 100 Meters in the Black Sea. *Appl Environ Microbiol* **71**:8049–8060.  
783 doi:10.1128/aem.71.12.8049-8060.2005
- 784 Martin M. 2011. Cutadapt removes adapter sequences from high-throughput

- 785 sequencing reads. *EMBnet.journal* **17**:10. doi:10.14806/ej.17.1.200
- 786 Máthé I, Borsodi AK, Tóth EM, Felföldi T, Jurecska L, Krett G, Kelemen Z, Elekes E,  
787 Barkács K, Márialigeti K. 2014. Vertical physico-chemical gradients with distinct  
788 microbial communities in the hypersaline and heliothermal Lake Ursu (Sovata,  
789 Romania). *Extremophiles* **18**:501–514. doi:10.1007/s00792-014-0633-1
- 790 McLusky DS, Elliott M. 2004. The estuarine ecosystem: ecology, threats and  
791 management. Oxford University Press on Demand.  
792 doi:10.1093/acprof:oso/9780198525080.001.0001
- 793 Meyer F, Paarmann D, D'Souza M, Olson R, Glass EM, Kubal M, Paczian T, Rodriguez  
794 A, Stevens R, Wilke A, Wilkening J, Edwards RA. 2008. The metagenomics RAST  
795 server – a public resource for the automatic phylogenetic and functional analysis of  
796 metagenomes. *BMC Bioinformatics* **9**:1–8. doi:10.1186/1471-2105-9-386
- 797 Møller MM, Nielsen LP, Jørgensen BB. 1985. Oxygen Responses and Mat Formation  
798 by *Beggiatoa* spp. *Appl Environ Microbiol* **50**:373–382.
- 799 Moore WS. 1999. The subterranean estuary: a reaction zone of ground water and sea  
800 water. *Mar Chem* **65**:111–125. doi:http://dx.doi.org/10.1016/S0304-4203(99)00014-  
801 6
- 802 Moran MA, Sheldon WM, Zepp RG. 2000. Carbon loss and optical property changes  
803 during long-term photochemical and biological degradation of estuarine dissolved  
804 organic matter. *Limnol Oceanogr* **45**:1254–1264. doi:10.4319/lo.2000.45.6.1254
- 805 Morrison HG, Grim SL, Vineis JH, Mitchell LS. 2013. 16S amplicon fusion primers and  
806 protocol for Illumina platform sequencing. doi:10.6084/m9.figshare.833944.v1
- 807 Muylaert K, Sabbe K, Vyverman W. 2000. Spatial and Temporal Dynamics of  
808 Phytoplankton Communities in a Freshwater Tidal Estuary (Schelde, Belgium).  
809 *Estuar Coast Shelf Sci* **50**:673–687. doi:http://dx.doi.org/10.1006/ecss.2000.0590
- 810 Nelson JL, Zavaleta ES. 2012. Salt Marsh as a Coastal Filter for the Oceans: Changes  
811 in Function with Experimental Increases in Nitrogen Loading and Sea-Level Rise.  
812 *PLoS One* **7**:e38558. doi:10.1371/journal.pone.0038558
- 813 Nicholson JAM, Stolz JF, Pierson BK. 1987. Structure of a microbial mat at Great  
814 Sippewissett Marsh, Cape Cod, Massachusetts. *FEMS Microbiol Lett* **45**:343–364.  
815 doi:10.1016/0378-1097(87)90021-8
- 816 Oksanen J, Blanchet FG, Kindt R, Legendre P, Minchin PR, O'Hara RB, Simpson GL,  
817 Solymos P, Stevens MHH, Wagner H. 2012. vegan: Community Ecology Package.
- 818 Oren A. 2011. Characterization of Pigments of Prokaryotes and Their Use in Taxonomy  
819 and Classification. *Methods Microbiol* **38**:261–282. doi:10.1016/B978-0-12-387730-  
820 7.00012-7
- 821 Pant HK, Reddy KR. 2001. Phosphorus Sorption Characteristics of Estuarine

- 822 Sediments under Different Redox Conditions. *J Environ Qual* **30**:1474.  
823 doi:10.2134/jeq2001.3041474x
- 824 Parkin TB, Brock TD. 1980. The effects of light quality on the growth of phototrophic  
825 bacteria in lakes. *Arch Microbiol* **125**:19–27. doi:10.1007/bf00403193
- 826 Parks DH, Imelfort M, Skennerton CT, Hugenholtz P, Tyson GW. 2015. CheckM:  
827 assessing the quality of microbial genomes recovered from isolates, single cells,  
828 and metagenomes. *Genome Res* **25**:1043–1055. doi:10.1101/gr.186072.114
- 829 Peduzzi P, Herndl GJ. 1991. Decomposition and significance of seagrass leaf litter  
830 (*Cymodocea nodosa*) for the microbial food web in coastal waters (Gulf of Trieste,  
831 Northern Adriatic Sea). *Mar Ecol Prog Ser* **71**:163–174.
- 832 Pfennig N, Biebl H. 1976. *Desulfuromonas acetoxidans* gen. nov. and sp. nov., a new  
833 anaerobic, sulfur-reducing, acetate-oxidizing bacterium. *Arch Microbiol* **110**:3–12.  
834 doi:10.1007/BF00416962
- 835 Pierson B, Oesterle A, Murphy GL. 1987. Pigments, light penetration, and  
836 photosynthetic activity in the multi-layered microbial mats of Great Sippewissett  
837 Salt Marsh, Massachusetts. *FEMS Microbiol Lett* **45**:365–376. doi:10.1016/0378-  
838 1097(87)90022-X
- 839 Pjevac P, Korlević M, Berg JS, Bura-Nakić E, Ciglencečki I, Amann R, Orlić S. 2015.  
840 Community shift from phototrophic to chemotrophic sulfide oxidation following  
841 anoxic holomixis in a stratified seawater lake. *Appl Environ Microbiol* **81**:298–308.  
842 doi:10.1128/AEM.02435-14
- 843 Purdy KJ, Embley TM, Nedwell DB. 2002. The distribution and activity of sulphate  
844 reducing bacteria in estuarine and coastal marine sediments. *Antonie Van*  
845 *Leeuwenhoek* **81**:181–187. doi:10.1023/a:1020550215012
- 846 Quast C, Pruesse E, Yilmaz P, Gerken J, Schweer T, Yarza P, Peplies J, Glöckner FO.  
847 2013. The SILVA ribosomal RNA gene database project: improved data processing  
848 and web-based tools. *Nucleic Acids Res* **41**:D590–D596. doi:10.1093/nar/gks1219
- 849 Ritchie AE, Johnson ZI. 2012. Abundance and Genetic Diversity of Aerobic Anoxygenic  
850 Phototrophic Bacteria of Coastal Regions of the Pacific Ocean. *Appl Environ*  
851 *Microbiol* **78**:2858–2866. doi:10.1128/aem.06268-11
- 852 Roberts DW. 2012. labdsv: Ordination and Multivariate Analysis for Ecology.
- 853 Schloss PD, Westcott SL, Ryabin T, Hall JR, Hartmann M, Hollister EB, Lesniewski RA,  
854 Oakley BB, Parks DH, Robinson CJ, Sahl JW, Stres B, Thallinger GG, Van Horn  
855 DJ, Weber CF. 2009. Introducing mothur: Open-source, platform-independent,  
856 community-supported software for describing and comparing microbial  
857 communities. *Appl Environ Microbiol* **75**:7537–7541. doi:10.1128/AEM.01541-09
- 858 Schmieder R, Edwards R. 2011. Quality control and preprocessing of metagenomic  
859 datasets. *Bioinformatics* **27**:863–4. doi:10.1093/bioinformatics/btr026

- 860 Silva GGZ, Cuevas D a, Dutilh BE, Edwards R a. 2014. FOCUS: an alignment-free  
861 model to identify organisms in metagenomes using non-negative least squares.  
862 *PeerJ* **2**:e425. doi:10.7717/peerj.425
- 863 Simpson JH, Brown J, Matthews J, Allen G. 1990. Tidal straining, density currents, and  
864 stirring in the control of estuarine stratification. *Estuaries* **13**:125–132.  
865 doi:10.2307/1351581
- 866 Smith S V, Hollibaugh JT. 1993. Coastal metabolism and the oceanic organic carbon  
867 balance. *Rev Geophys* **31**:75–89. doi:10.1029/92RG02584
- 868 Srinivas TNR, Anil Kumar P, Sucharitha K, Sasikala C, Ramana C V. 2009.  
869 *Allochromatium phaeobacterium* sp. nov. *Int J Syst Evol Microbiol* **59**:750–753.  
870 doi:10.1099/ijs.0.65647-0
- 871 Stomp M, van Dijk MA, van Overzee HMJ, Wortel MT, Sigon CAM, Egas M, Hoogveld  
872 H, Gons HJ, Huisman J. 2008. The timescale of phenotypic plasticity and its impact  
873 on competition in fluctuating environments. *Am Nat* **172**:169–85.  
874 doi:10.1086/591680
- 875 Stookey LL. 1970. Ferrozine---a new spectrophotometric reagent for iron. *Anal Chem*  
876 **42**:779–781. doi:10.1021/ac60289a016
- 877 Waidner LA, Kirchman DL. 2005. Aerobic anoxygenic photosynthesis genes and  
878 operons in uncultured bacteria in the Delaware River. *Environ Microbiol* **7**:1896–  
879 1908.
- 880 Wanner G, Vogl K, Overmann J. 2008. Ultrastructural characterization of the prokaryotic  
881 symbiosis in &quot;Chlorochromatium aggregatum&quot;. *J Bacteriol* **190**:3721–30.  
882 doi:10.1128/JB.00027-08
- 883 Wattam AR, Davis JJ, Assaf R, Boisvert S, Brettin T, Bun C, Conrad N, Dietrich EM,  
884 Disz T, Gabbard JL, Gerdes S, Henry CS, Kenyon RW, Machi D, Mao C, Nordberg  
885 EK, Olsen GJ, Murphy-Olson DE, Olson R, Overbeek R, Parrello B, Pusch GD,  
886 Shukla M, Vonstein V, Warren A, Xia F, Yoo H, Stevens RL. 2017. Improvements  
887 to PATRIC, the all-bacterial bioinformatics database and analysis resource center.  
888 *Nucleic Acids Res* **45**:D535–D542. doi:10.1093/nar/gkw1017
- 889 Wickham H. 2018. stringr: Simple, Consistent Wrappers for Common String Operations.
- 890 Wickham H. 2009. ggplot2: Elegant Graphics for Data Analysis. New York: Springer-  
891 Verlag New York.
- 892 Wickham H, François R, Henry L, Müller K. 2018. dplyr: A Grammar of Data  
893 Manipulation.
- 894 Wimpenny JWT, Wiegel J, Kuenen JG. 1982. Responses of Microorganisms to Physical  
895 and Chemical Gradients [and Discussion]. *Philos Trans R Soc Lond B Biol Sci*  
896 **297**:497–515.



- 897 Zaikova E, Walsh DA, Stilwell CP, Mohn WW, Tortell PD, Hallam SJ. 2010. Microbial  
898 community dynamics in a seasonally anoxic fjord: Saanich Inlet, British Columbia.  
899 *Environ Microbiol* **12**:172–191. doi:10.1111/j.1462-2920.2009.02058.x
- 900 Zhang Q, Ye Y. 2017. Not all predicted CRISPR–Cas systems are equal: isolated cas  
901 genes and classes of CRISPR like elements. *BMC Bioinformatics* **18**:92.  
902 doi:10.1186/s12859-017-1512-4
- 903 Zopfi J, Ferdelman TG, Jørgensen BB, Teske A, Thamdrup B. 2001. Influence of water  
904 column dynamics on sulfide oxidation and other major biogeochemical processes in  
905 the chemocline of Mariager Fjord (Denmark). *Mar Chem* **74**:29–51.  
906 doi:[http://dx.doi.org/10.1016/S0304-4203\(00\)00091-8](http://dx.doi.org/10.1016/S0304-4203(00)00091-8)
- 907
