# Supplementary material for: Microbial community dynamics and coexistence in a sulfide-driven phototrophic bloom
Source: bioRxiv or medRxiv preprint supplement (doi:10.1101/604504), 2019-09-22
Supplement: Supplementary file [file media-1.pdf]

1 Supplementary Materials for the manuscript:

2

3

4 **Microbial community dynamics and coexistence in a sulfide-driven phototrophic**  
5 **bloom**

6

7 Authors

8 Srijak Bhatnagar\*, Elise S. Cowley\*, Sebastian H. Kopf, Sherlynette Pérez Castro, Sean

9 Kearney, Scott C. Dawson, Kurt Hanselmann, S. Emil Ruff

10

11

12

13

14

15

## 16 **Supplementary Materials and Methods**

17

### 18 16S rRNA gene libraries and construction of phylogeny

19 From the DNA of Sample 7A3 (Replicate hole A, at 25 cm depth at time point 7) clone  
20 library was made in following way. The 16S rRNA gene was amplified using 27F  
21 (Bacterial - AGAGTTTGATCMTGGCTCAG) or 4Fa (Archaeal -  
22 TCCGGTTGATCCTGCCRG) forward primer and 1391R (broad range -  
23 GACGGGCGGTGTGTRCA) reverse primer. The PCR product was cleaned using  
24 Promega Wizard® PCR Cleanup system and cloned using pGEM®-T easy system  
25 using manufacturer supplied standard protocol (Promega Corporation, Madison, WI).  
26 Briefly, the cleaned PCR product was ligated in vector, followed by vector cloning into  
27 Promega JM109 competent cells. The transformed cells were selected and screened  
28 using blue-white colony screening on LB plate with ampicillin, X-gal, and IPTG. The  
29 transformed cells were grown in liquid LB broth with ampicillin for 12 hours and the  
30 plasmid was extracted using Promega PureYield™ plasmid system. The plasmid was  
31 send to Sequetech DNA Sequencing Service (Mountain View, CA) for Sanger  
32 sequencing from one end using the T7 primer.

33

34 16S rRNA gene phylogeny was calculated using ARB/SILVA (Ludwig et al., 2004) and  
35 the SILVA database SSU Ref NR 132 (Quast et al., 2013). We added the sequences to  
36 the SILVA tree using the ARB maximum parsimony quick-add tool and chose near full-  
37 length (>1300 nucleotides) reference sequences from neighboring clades and isolates.  
38 We aligned these sequences using SINA (Pruesse et al., 2012) and manually curated  
39 the alignment based on ribosomal secondary structure. This alignment was used to  
40 calculate a tree with the RAxML8 algorithm (Stamatakis, 2014) and a positional  
41 variability filter including only conserved positions in the alignment with  $\leq 3.1\%$  mutation  
42 rate. The final alignment had 1007 valid columns encompassing the *E. coli* reference  
43 positions 1785-40339. The tree was calculated with 100 iterations of which the most  
44 robust tree was selected. The partial gene sequences from this study were added to the  
45 consensus tree using the same positional variability filter without changing the overall  
46 tree topology.

47

48

## 49 **Supplementary Results**

### 50 Physicochemistry

51 Within the first three days the pH decreased between 1-2 units in all layers, from around  
52 pH 9 to pH 7 at 5 cm water depth ( $7.7 \pm 1.0$ ), from pH 8 to pH 7 at 10 cm ( $7.3 \pm 0.7$ ) and  
53 from pH 8 to pH 6.3 at 25 ( $6.7 \pm 0.8$ ) and 35 cm ( $6.8 \pm 0.7$ ) (Figure 2). Over the 15-day  
54 sampling period, the pH at 5 cm ( $7.3 \pm 0.8$ ) and 10 cm ( $6.9 \pm 0.6$ ) water depth showed  
55 more variation than at 25 cm ( $6.5 \pm 0.6$ ) and 35 cm ( $6.5 \pm 0.5$ ). At depths within and below  
56 the bloom, pH was very constant between 6 and 6.3.

57 The Fe(II) concentration at 5 cm and 10 cm was  $< 5 \mu\text{M}$  (Figure S4). The Fe(II)  
58 concentration at these depths showed less fluctuation over the 15 days of sampling as  
59 compared to 25 cm and 35 cm. With an average range of  $10 - 12 \mu\text{M}$  concentration,  
60 samples from 25 cm had the highest concentration of Fe(II). When compared to Fe(II),  
61 the Fe(III) concentrations were consistently lower at all depths between  $1-5 \mu\text{M}$ . With  
62 roughly  $20-25 \mu\text{M}$  of total iron, 25 cm samples had the highest iron concentration  
63 (Figure S5).

64 Nitrate concentration showed more fluctuation over the sampling period at shallower  
65 depths, specifically at 5 cm and 10 cm, with a short-lived nitrate spike 5 days after the  
66 start of the experiment (Figure S5). This spike coincides with a concentration dip in the  
67 major ions suggesting an input of nitrate rich freshwater, potentially from fertilizer-rich  
68 soil runoff. The nitrate concentrations at 25 cm were slightly higher than at other depths  
69 in the water column.

70 Ammonium and acetate concentrations were highest at 35 cm depth (up to  $4 \text{ mM}$  and  
71  $1.5 \text{ mM}$ , respectively) with significantly lower concentrations at the shallower sampling  
72 points (25 cm, 10 cm, 5 cm) including no detectable ammonium throughout the entire  
73 experiment at the surface (5 cm). This indicates a source of ammonium and acetate at  
74 depth which is consistent with ammonification and acetate generation from fermentative  
75 organic matter degradation of the decaying seagrass underneath.

76 In addition, measurements of sodium, fluoride, chloride, bromide, phosphate, lithium,  
77 magnesium, lactate, formate, succinate, propionate, butyrate and glucose were made  
78 on all samples collected. The values are not shown for reasons of clarity, but the raw  
79 data are still available. The values for sodium and chloride were outside the range of the  
80 standard calibration curve, hence these values were not analyzed.

81

82

83 **Supplementary Figures**  
84

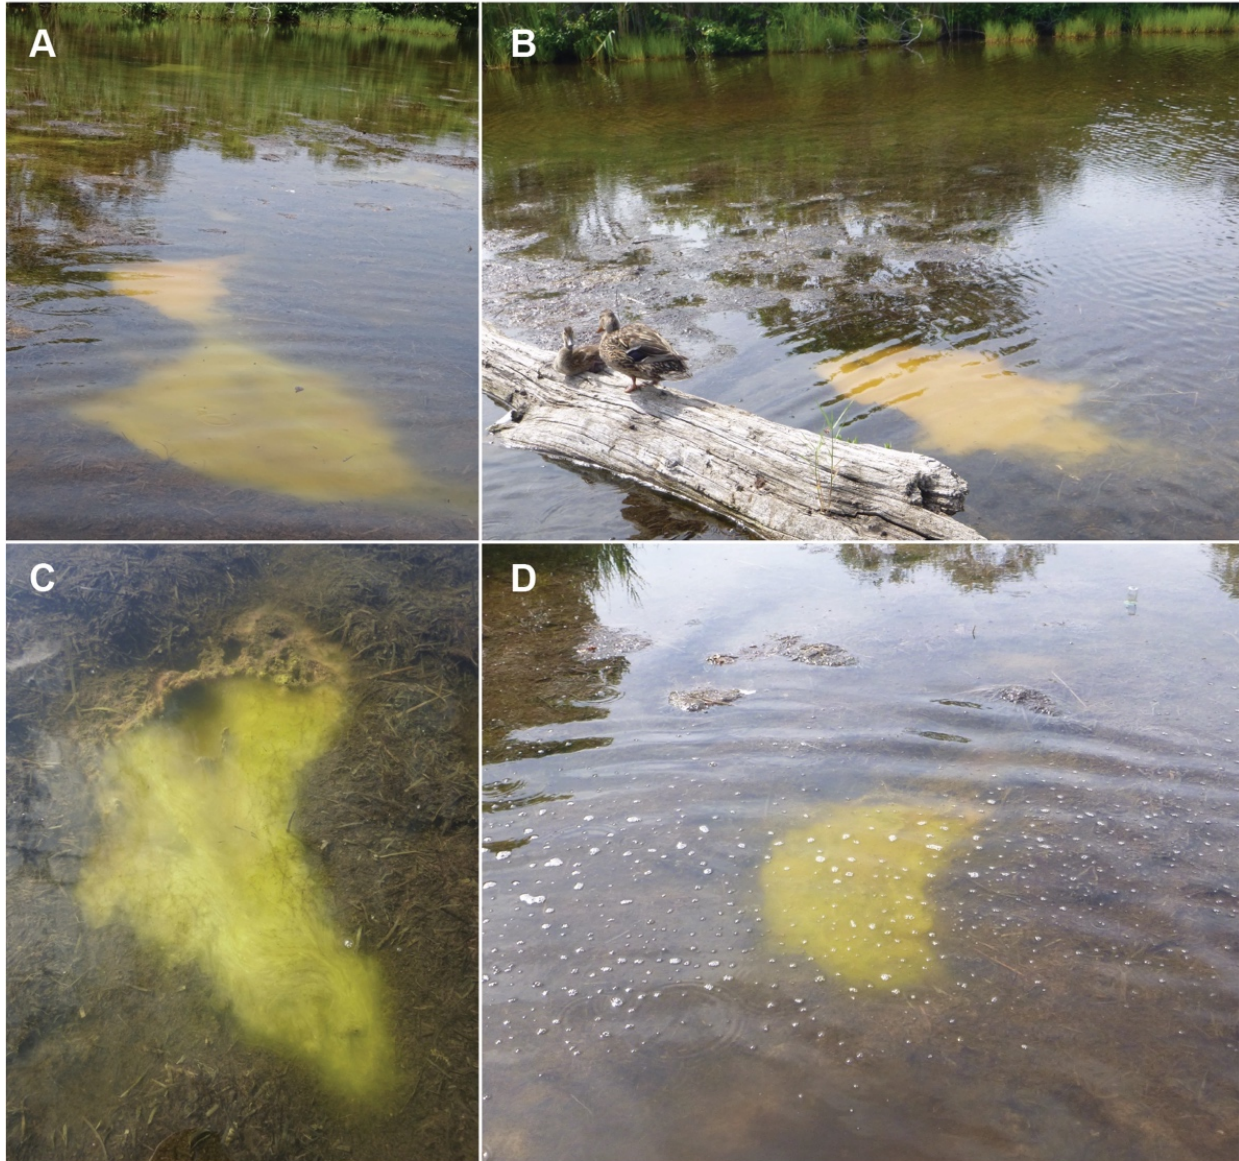

85  
86 **Figure S1:** Pictures of natural blooms in Trunk River. **B** is the natural bloom shown in the  
87 aerial overview Figure 1A. **C** is a close-up of bloom **D**.  
88

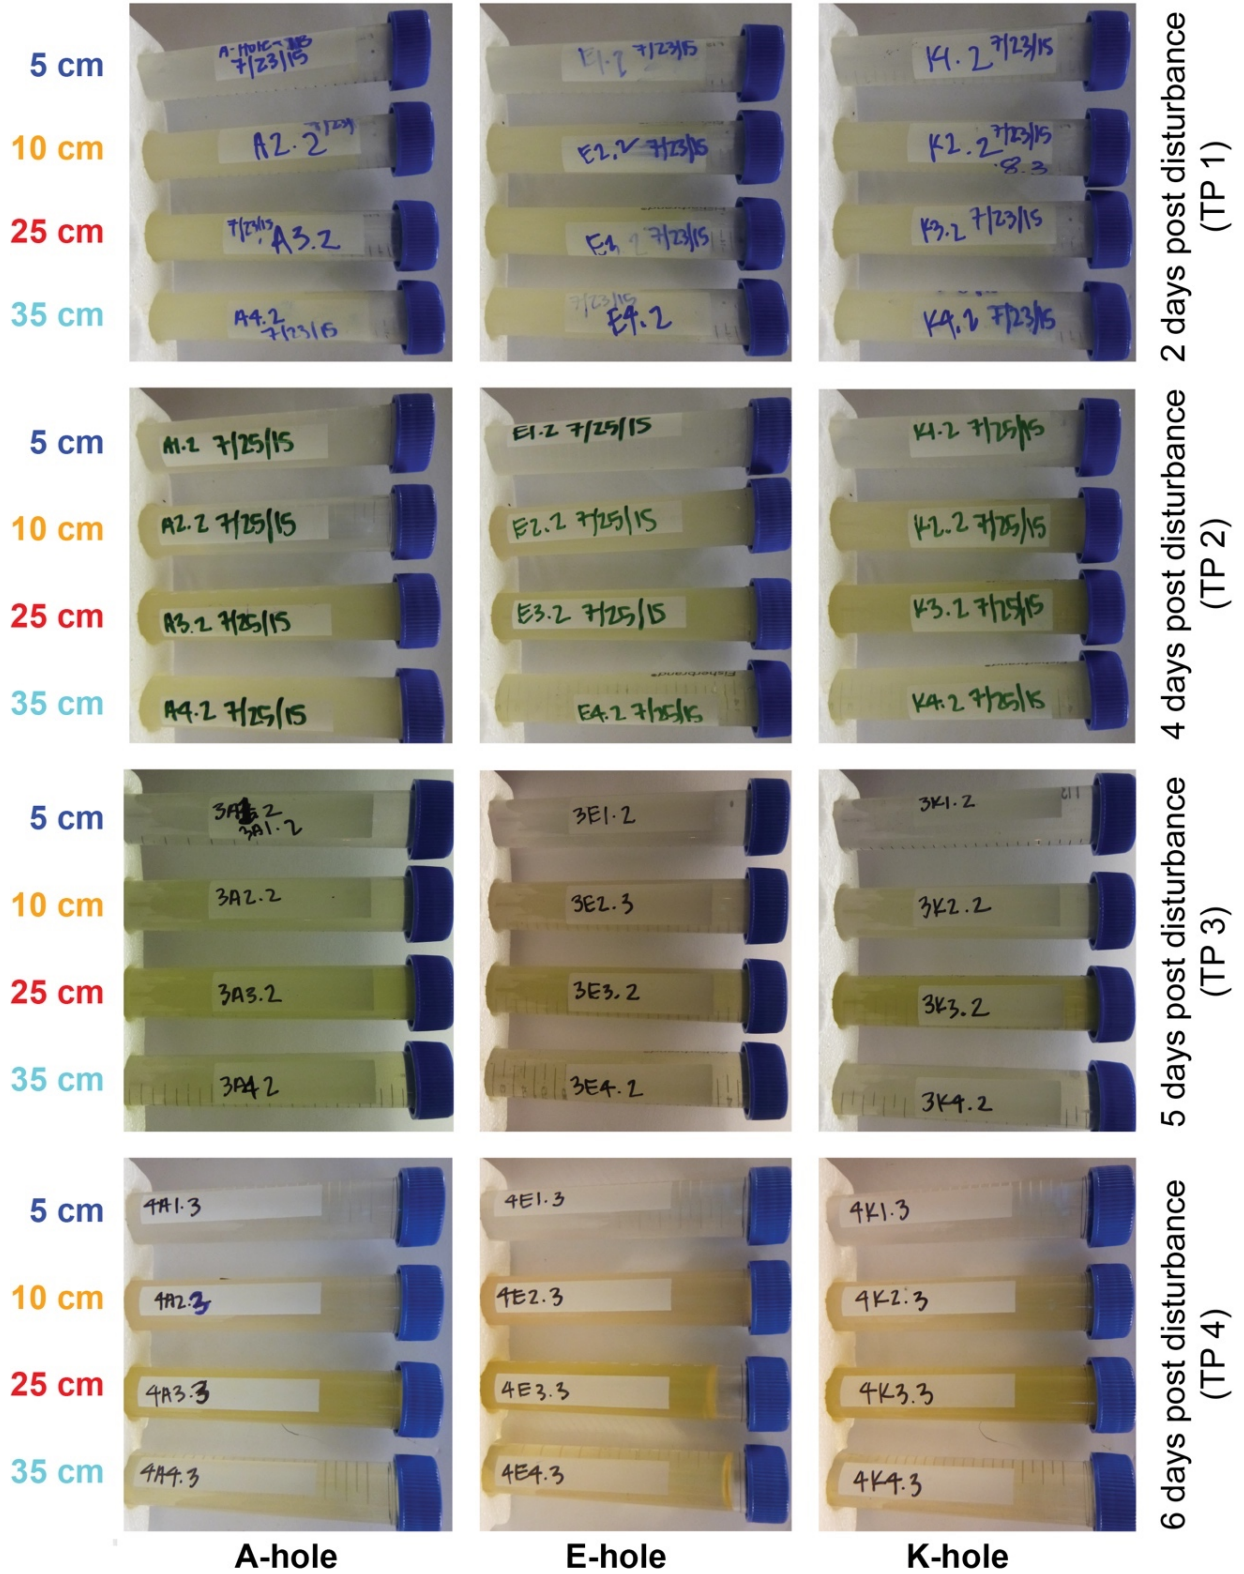

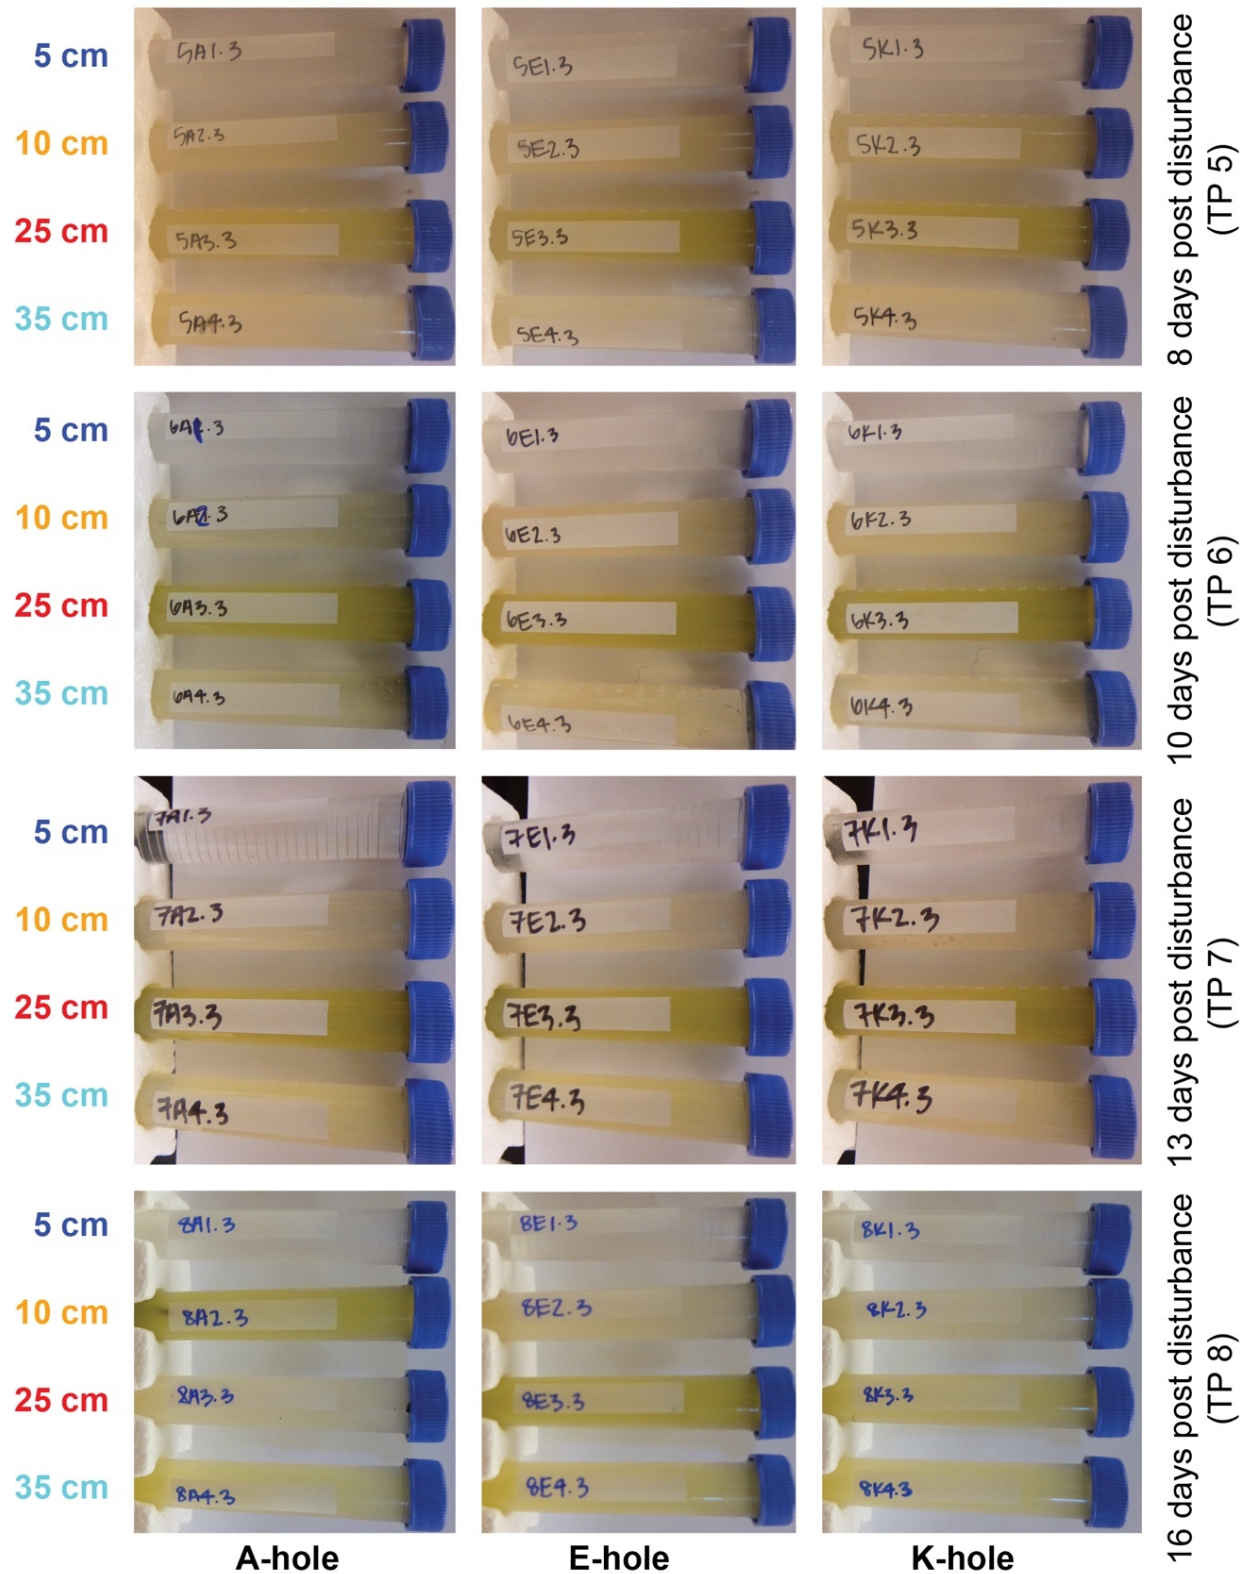

90  
91  
92  
93

**Figure S2:** Color and appearance of samples from all holes, depths, and timepoints.

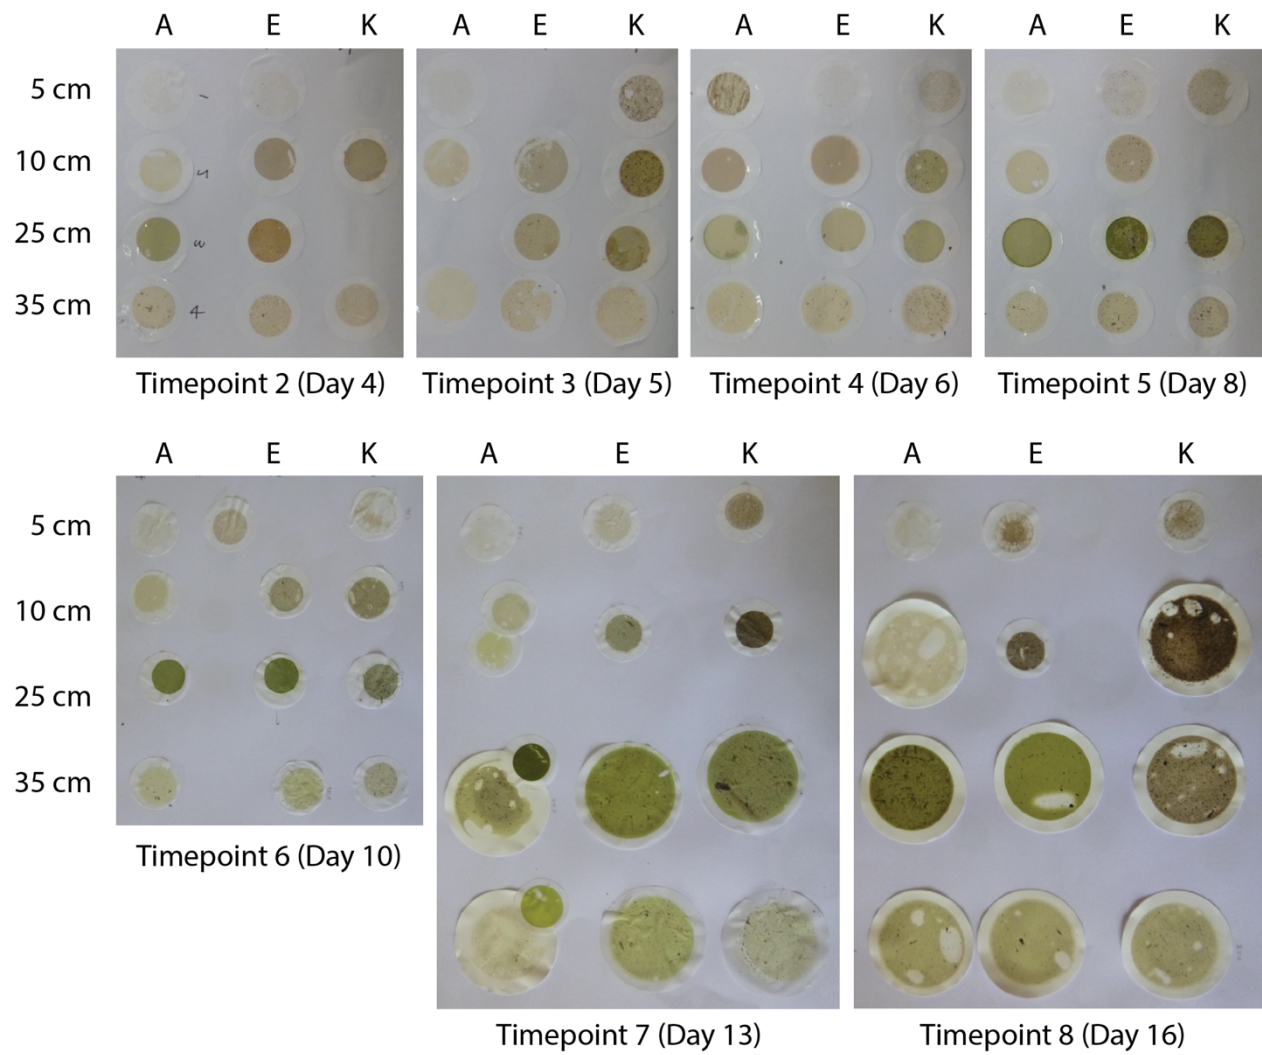

94  
95  
96

**Figure S3:** Filters that were used for biomass measurements and spectral analysis.

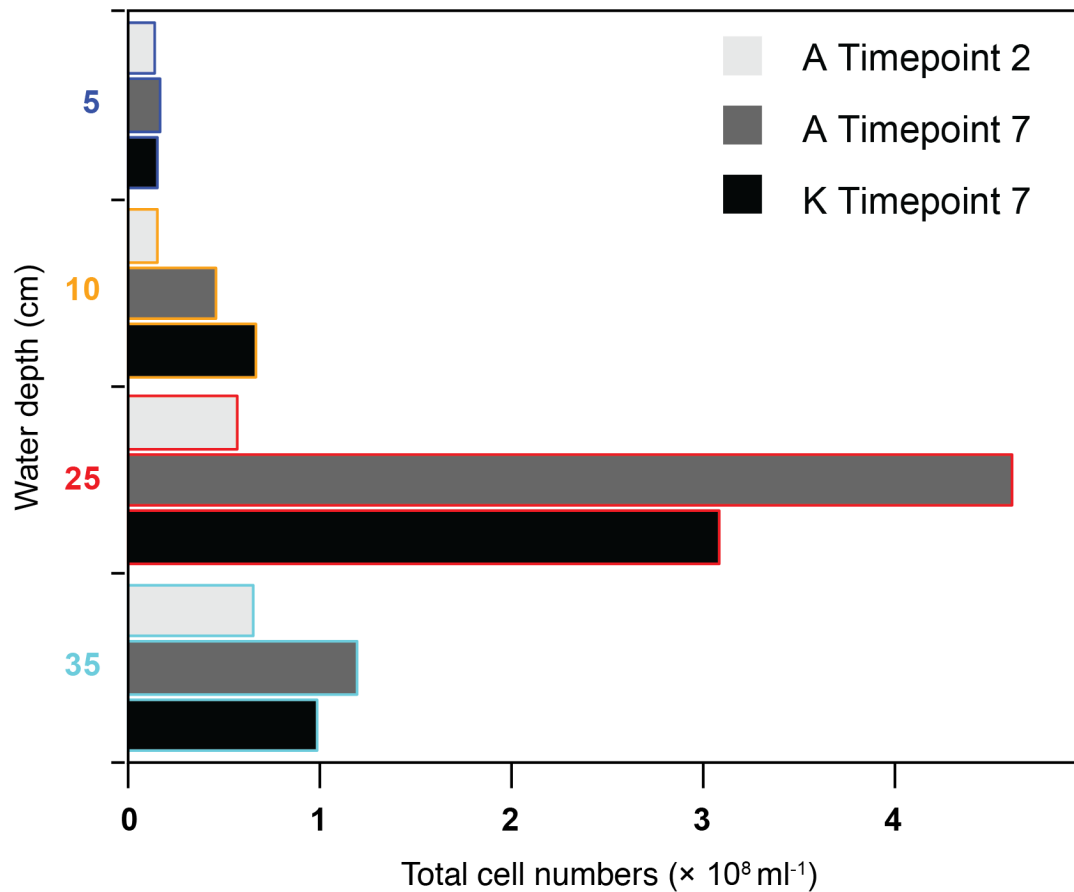

97  
98

99 **Figure S4: Total cell count** of three samples (A2, A7 and K7) showing the differences  
100 in cell numbers between layers at the beginning and close to end of the experiment,  
101 corroborating the results obtained from biomass measurements.

102  
103



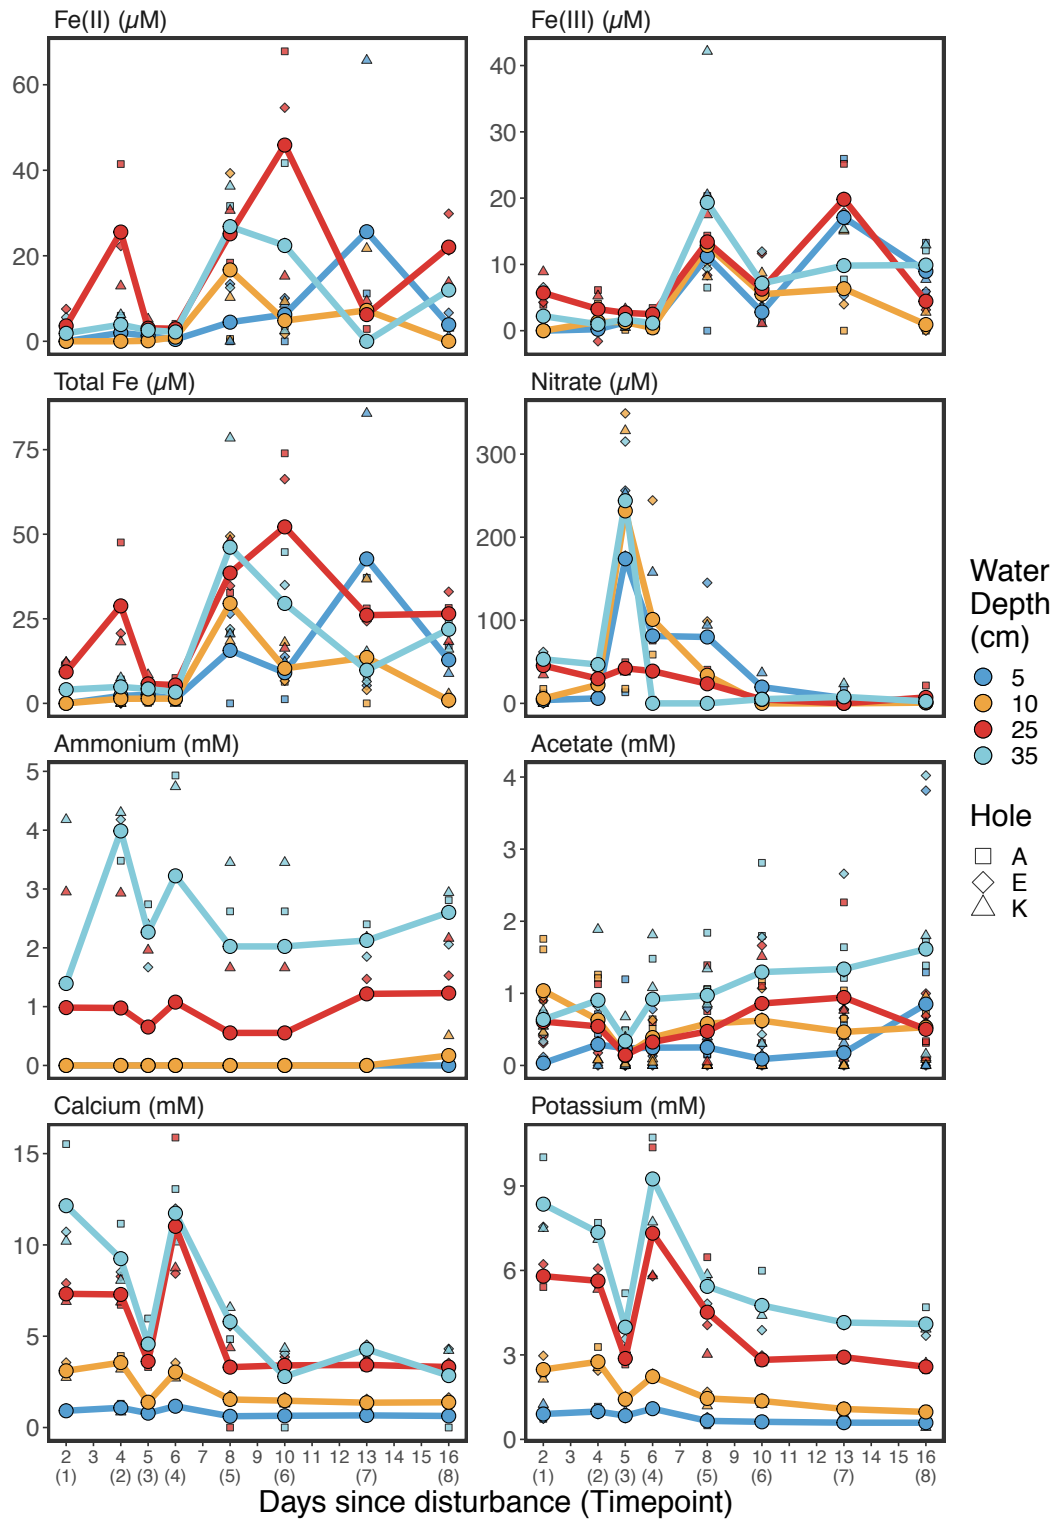

105  
 106  
 107  
 108  
 109

**Figure S5: Physicochemistry.** Iron, nitrate, ammonium, acetate, Ca<sup>2+</sup>, and K<sup>+</sup> measurements. The x-axis shows days since disturbance, y-axis the respective units.

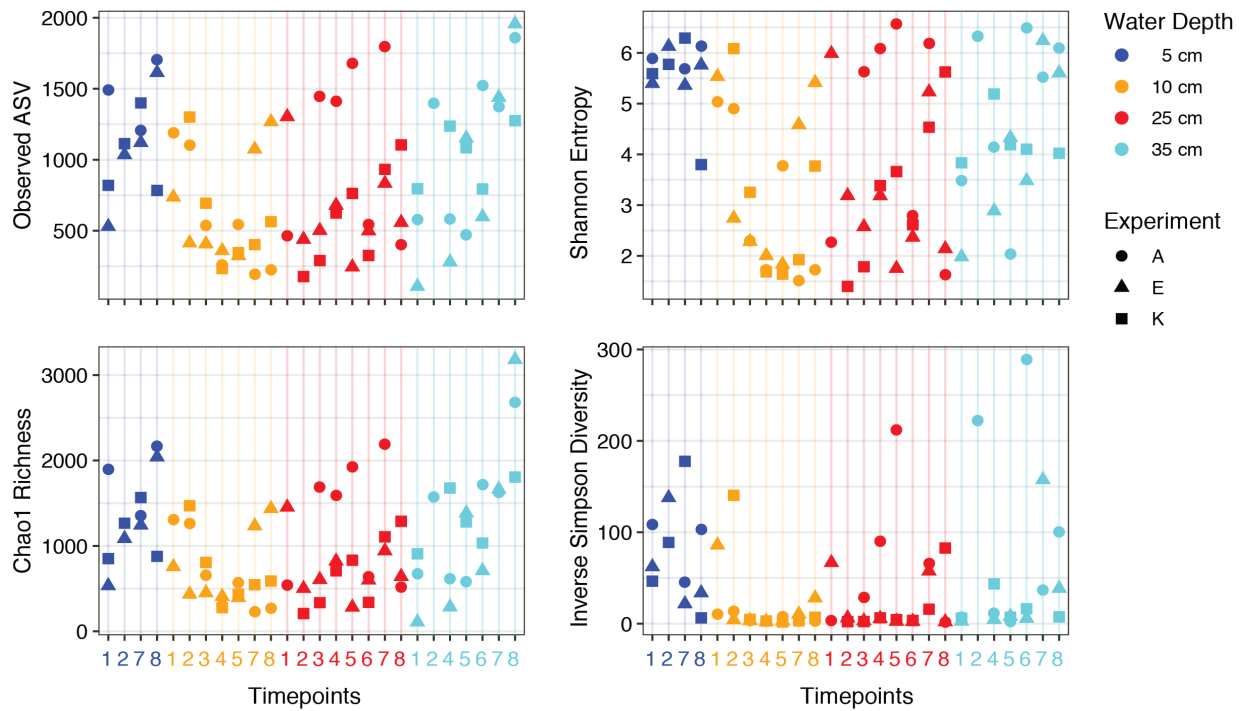

110

111 **Figure S6: Individual diversity Indices of all samples** showing the decrease in  
 112 diversity in the bloom, especially in layer 2 and 3.

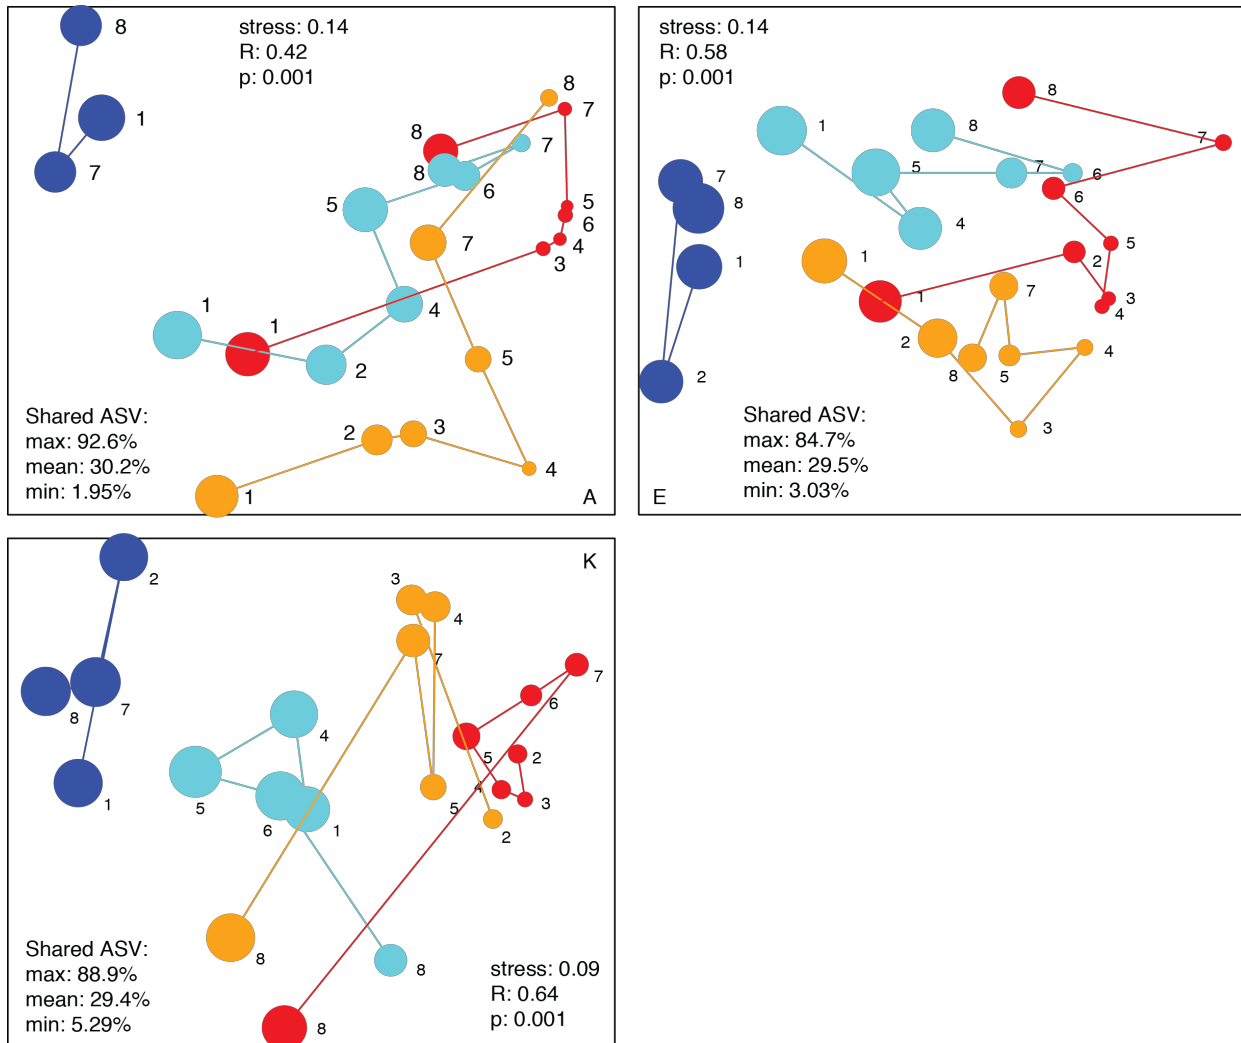

113  
 114 **Figure S7: Trajectories of community structure in hole A, E and K.** Circle size  
 115 represents average Shannon Diversity across three replicate holes. Sampling time  
 116 points are indicated as numbers. ASV: Amplicon Sequence Variant. Shared ASV show  
 117 maximal, minimal and average percentage of shared ASV between any pair of two  
 118 samples. Analysis of similarity (ANOSIM) was used to test whether the communities of  
 119 each depth layer were similar. R and p values show that the groups were overlapping,  
 120 but significantly different.

121  
 122

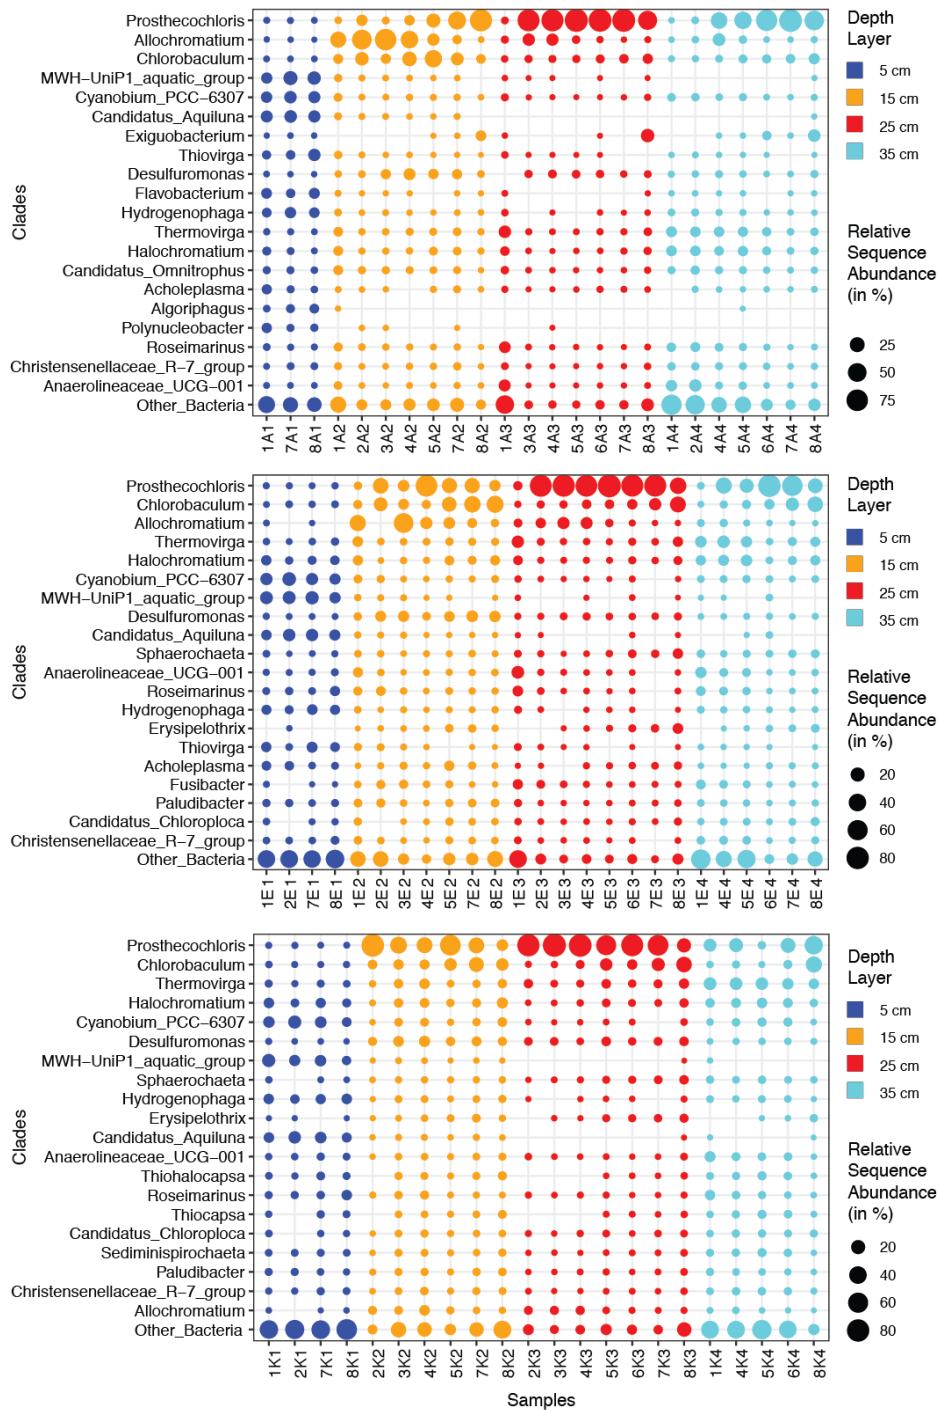

123  
 124  
 125  
 126  
 127

**Figure S8A:** Relative sequence abundance of the 20 most prominent genera in all three replicate experiments. Sample names include time point, experiment and depth, e.g. 3E2: Timepoint 3, E-hole, depth 3 (25 cm). A samples in top panel, E in middle panel, K in bottom panel).

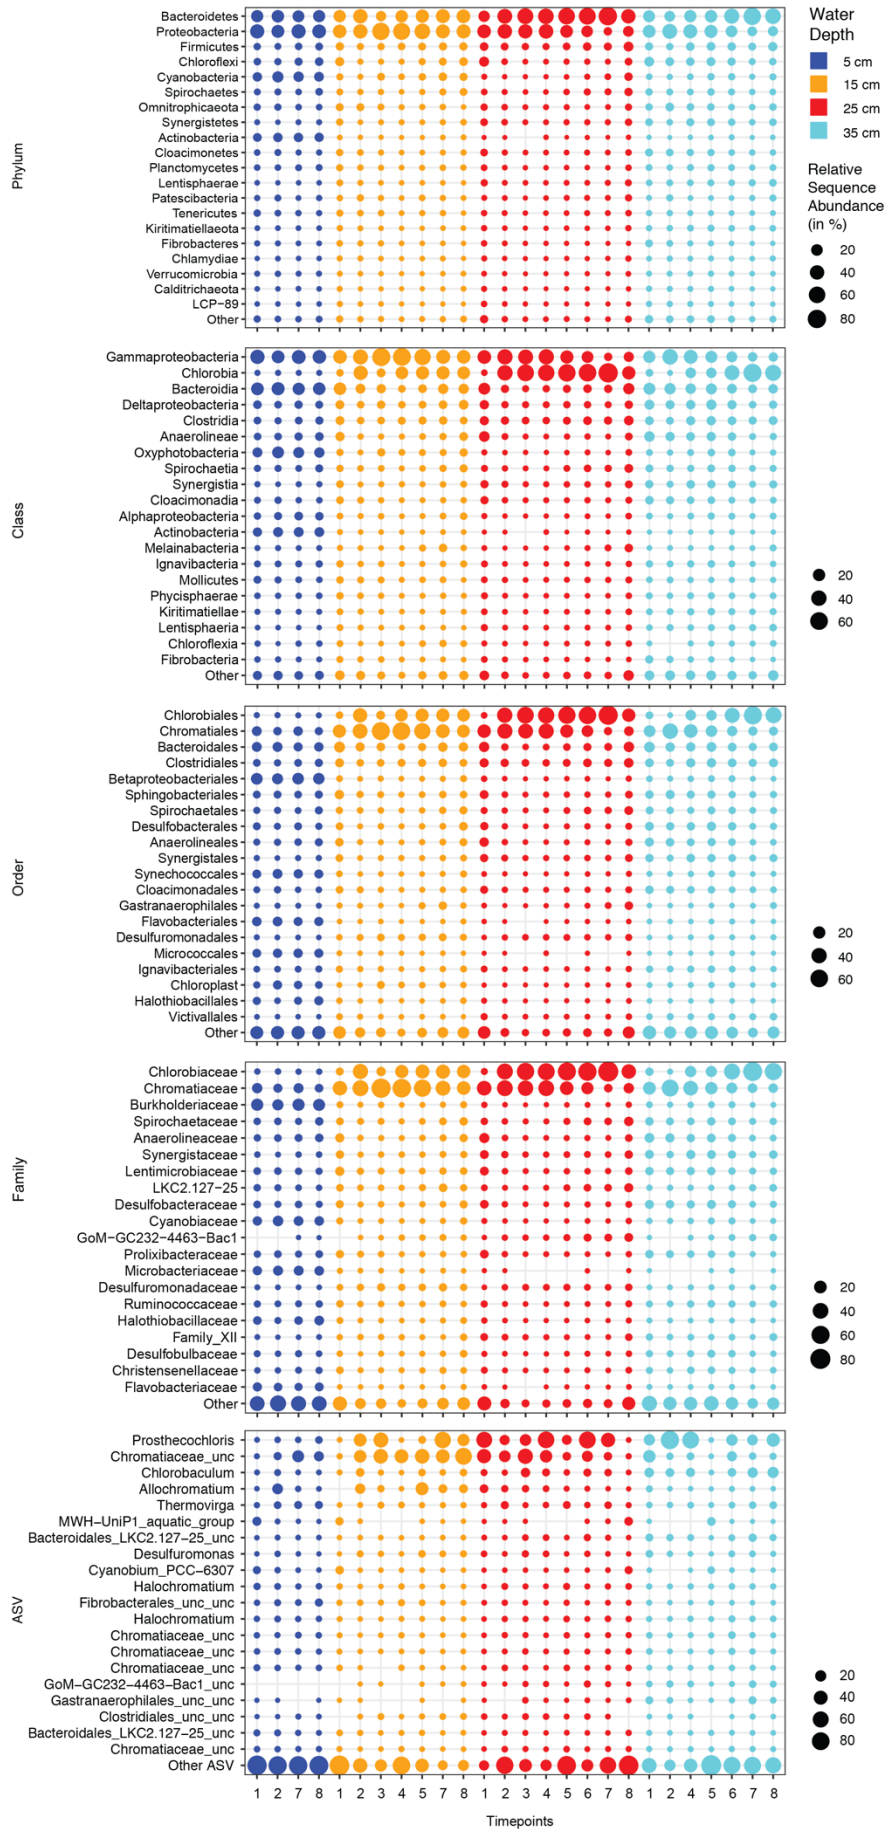

129 **Figure S8B:** Relative sequence abundance of the 20 most prominent clades on  
130 phylum, class, order and family level, as well as the 20 most sequence abundant ASVs  
131 (amplicon sequence variants). The suffix `_unc` and `_unc_unc` refers to ASV of an  
132 unclassified genus or family, respectively. These ASV belong to uncultured lineages  
133 and - due to their high relative abundance - are very likely not sequence errors. Values  
134 represent average across three replicate experiments. Note: Based on the new SILVA  
135 taxonomy, the Chlorobi are now a subphylum of the Bacteroidetes.

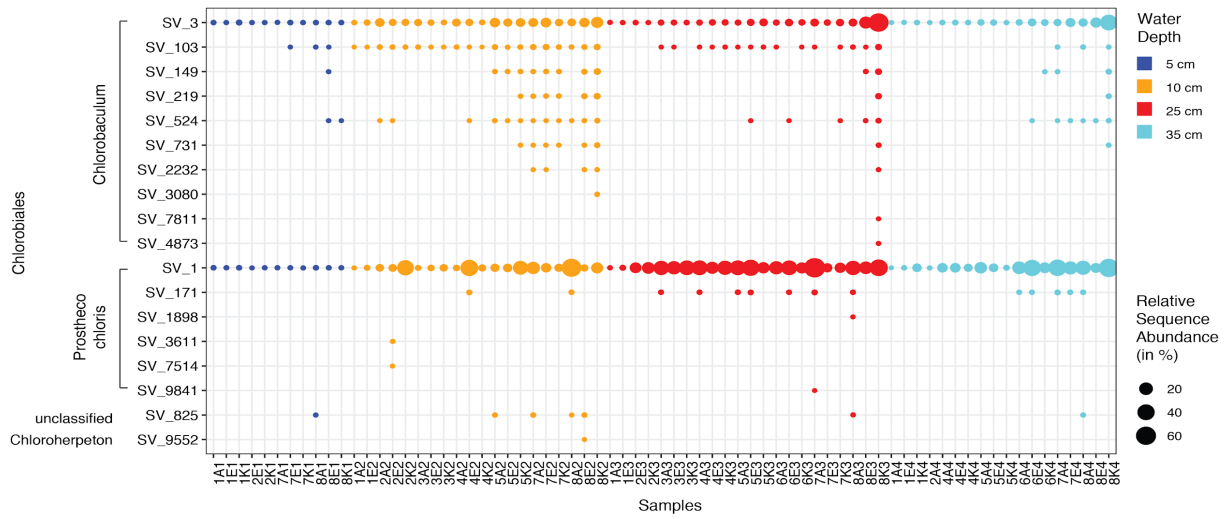

136  
 137  
 138  
 139  
 140  
 141  
 142

**Figure S9:** Relative sequence abundance of ASV within the *Chlorobiales* order. Sample names include time point, experiment and depth, e.g. 3E2: Timepoint 3, E-hole, depth 3 (25 cm). All samples, and replicate experiments are shown.

143

|                               | 5 cm | 10 cm | 25 cm | 35 cm |
|-------------------------------|------|-------|-------|-------|
| Prosthecochloris              | 1    | 2.23  | 2.61  | 2.07  |
| Chlorobaculum                 | 1    | 2.37  | 2.24  | 2.45  |
| Allochromatium                | 1    | 5.76  | 3.73  | 1.95  |
| Thermovirga                   | 1    | 1.05  | 2.05  | 1.64  |
| Halochromatium                | 1    | 1.64  | 1.95  | 1.47  |
| Cyanobium_PCC-6307            | 1    | 1.03  | 0.83  | 1.04  |
| MWH-UniP1_aquatic_group       | 1    | 1.15  | 0.95  | 0.99  |
| Desulfuromonas                | 1    | 3.77  | 5.27  | 3.09  |
| Candidatus_Aquiluna           | 1    | 0.76  | 0.56  | 0.86  |
| Hydrogenophaga                | 1    | 1.49  | 1.11  | 1.06  |
| Sphaerochaeta                 | 1    | 1.21  | 1.57  | 1.83  |
| Thiovirga                     | 1    | 0.73  | 0.87  | 0.57  |
| Exiguobacterium               | 1    | 3.74  | 6.61  | 1.19  |
| Anaerolineaceae_UCG-001       | 1    | 0.84  | 1.47  | 1.33  |
| Flavobacterium                | 1    | 0.67  | 0.49  | 0.65  |
| Roseimarinus                  | 1    | 1.54  | 2.37  | 2.00  |
| Erysipelothrix                | 1    | 1.25  | 1.54  | 2.32  |
| Candidatus_Chloroploca        | 1    | 1.80  | 2.45  | 1.67  |
| Christensenellaceae_R-7_group | 1    | 1.46  | 2.15  | 1.37  |
| Paludibacter                  | 1    | 1.51  | 1.79  | 1.74  |
| Other                         | 1    | 1.42  | 1.59  | 1.30  |

144

145 **Figure S10:** Relative change of sequence abundance of ASVs between surface (V1) and  
146 deeper layers (V2-4)

147

148



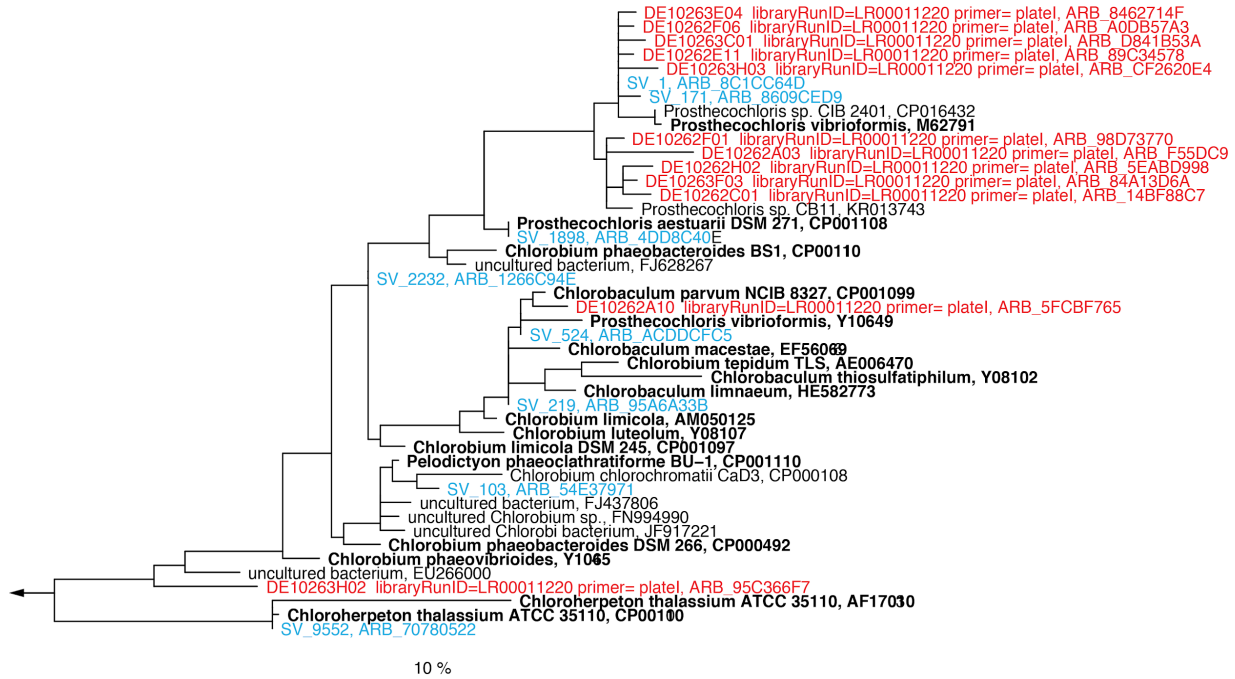

150  
 151  
 152  
 153  
 154  
 155  
 156

**Figure S11:** A phylogenetic tree depicting the affiliation of ASVs (blue), gene library sequences (red) and neighboring reference sequences (cultured isolates are in bold face). The Genbank accession of reference sequences is provided in the node labels. Scale bar shows estimated sequence divergence. Note: Accession numbers will be provided once the recently submitted sequences are processed and public.

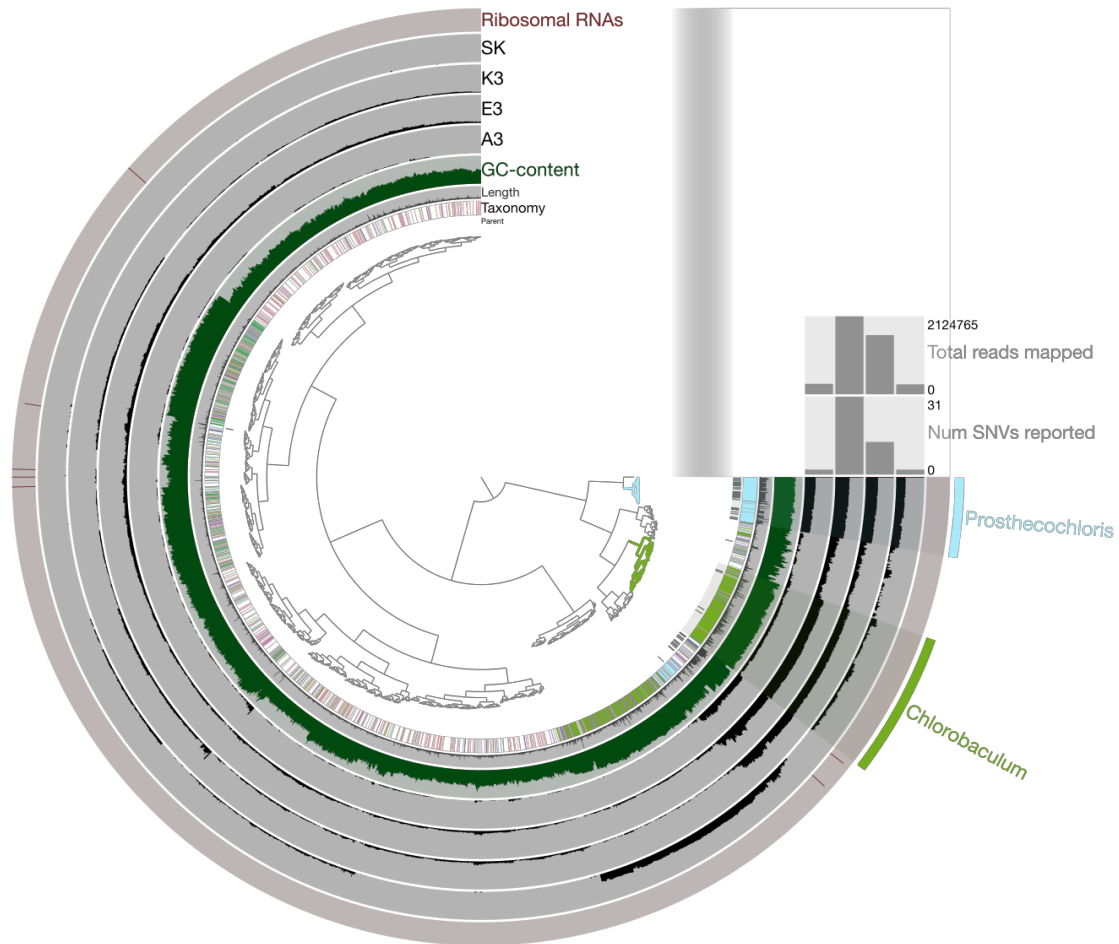

158

159

160

161

162 **Figure S12:** Circular map of metagenome-assembled genomes (MAGs) visualized  
 163 using Anvi'o. The clustering dendrogram for contigs is based upon taxonomy, contig  
 164 length, GC-content, and ribosomal RNA operons (from inner to outer rings) [2]. Bin 10  
 165 (*Prosthecochloris* sp.) and Bin 6 (*Chlorobaculum* sp.) metagenome-assembled  
 166 genomes are highlighted.

167

168

169  
170

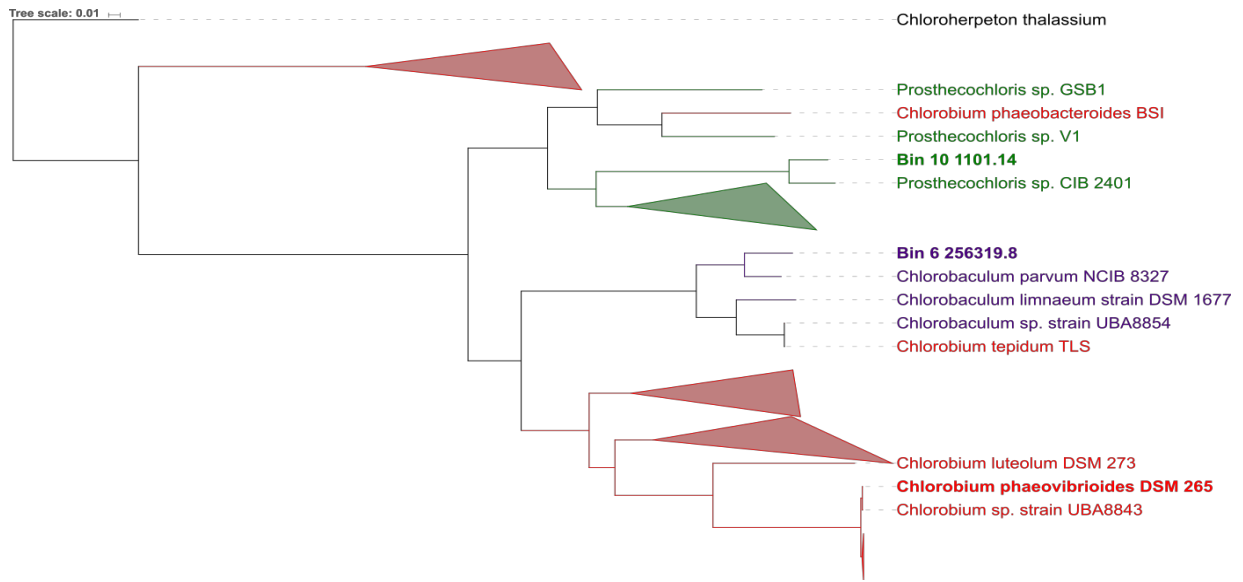

171  
172  
173  
174  
175  
176  
177  
178  
179  
180  
181  
182  
183  
184  
185  
186

**Figure S13:** Hierarchical clustering analysis showing *Chlorobaculum parvum* NCBI 8327 as the closest genome to Bin 6 (ANI value 85.13%). *Prosthecochloris sp.* CIB 2401 is the closest genome to Bin 10. The scale bar represents the average number of substitutions per site.

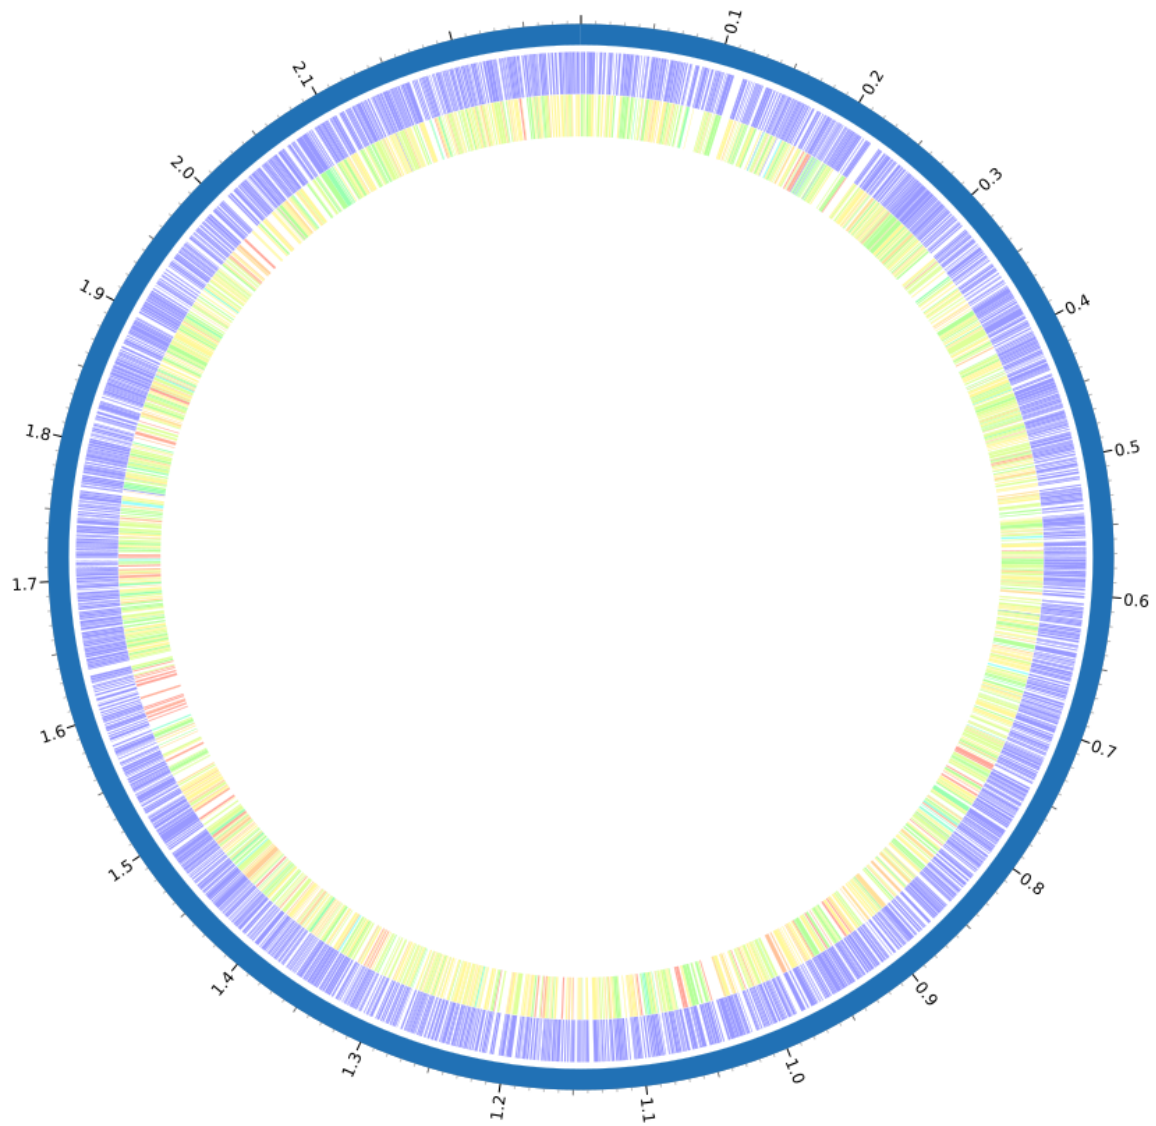

187

|                         | Percent protein sequence identity |      |      |      |    |    |    |    |    |    |    |    |    |    |    |    |
|-------------------------|-----------------------------------|------|------|------|----|----|----|----|----|----|----|----|----|----|----|----|
| Bidirectional best hit  | 100                               | 99.9 | 99.8 | 99.5 | 99 | 98 | 95 | 90 | 80 | 70 | 60 | 50 | 40 | 30 | 20 | 10 |
| Unidirectional best hit | 100                               | 99.9 | 99.8 | 99.5 | 99 | 98 | 95 | 90 | 80 | 70 | 60 | 50 | 40 | 30 | 20 | 10 |

188

189

190

191

192

193

**Figure S14:** Protein comparison of the reconstructed population genome (Bin 6) compared against the genome closest neighbor *Chlorobaculum parvum* NCBI 8327. Rings from outside to inside: the contig of the reference species, the reference bacterial species and the potentially novel population genome with the color scale representing the protein similarity.

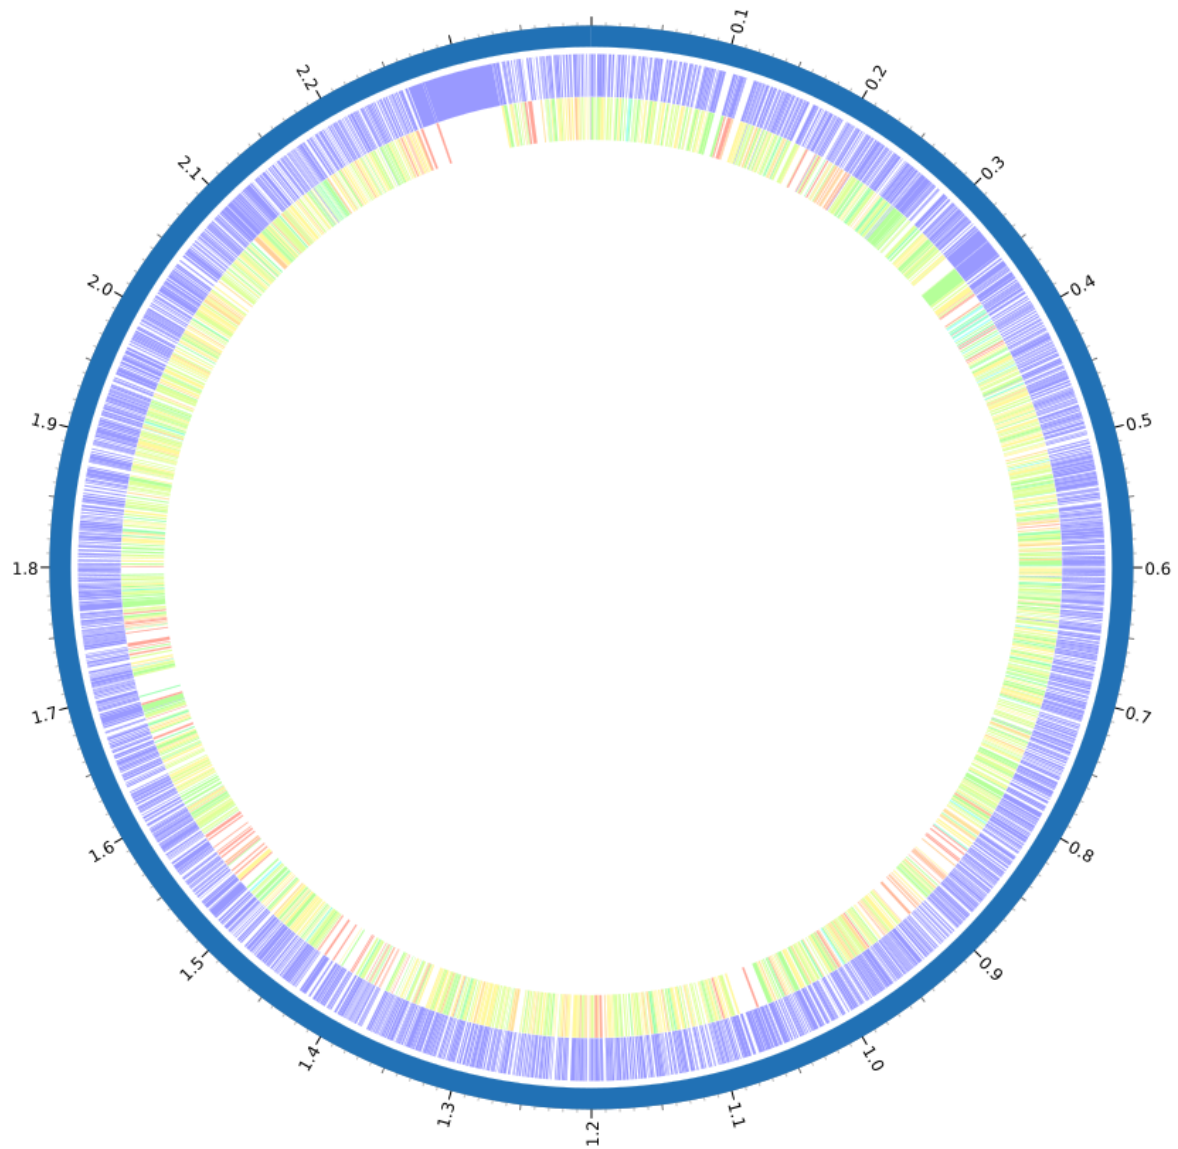

194

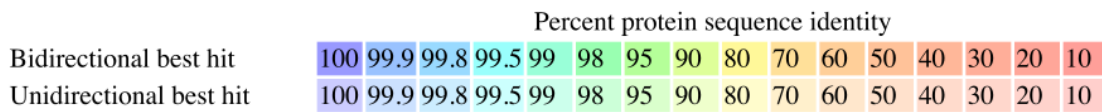

195

196

197

198

199

200

201

**Figure S15:** Protein comparison of the reconstructed population genome (Bin 10) compared against the genome closest neighbor *Prosthecochloris sp.* CIB 2401. Rings from outside to inside: the contig of the reference species, the reference bacterial species and the potentially novel population genome with the color scale representing the protein similarity.

**a** Bin 6 CRISPR array 1

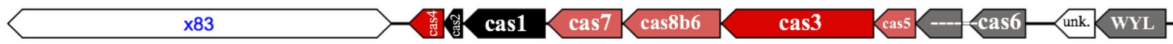

Bin 6 CRISPR array 2-3

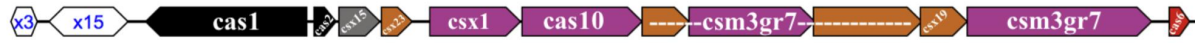

**b** *Chlorobaculum parvum* NCBI 8327 CRISPR array

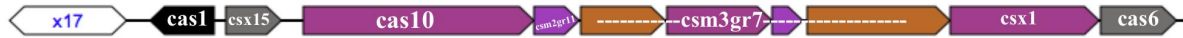

202  
203  
204  
205  
206  
207  
208  
209  
210  
211

**Figure S16:** CRISPR arrays and *cas* genes predictions from (a) Bin 6 and (b) *Chlorobaculum parvum* NCBI 8327. CRISPR arrays are in white with the number of repeats, and *cas* genes are color-coded according to types/subtypes. Cas1 and cas2, which are present in most known CRISPR-Cas systems, are in black; cas3 and cas10, which are the signatures of CRISPR-Cas systems types along with Cas9 (Type II), are in red (Type I) and purple (Type III), respectively; variants of the multi-subunit complex (csm), cas10, and csx Type III genes are also in purple, and dispensable components, such as cas6, are in gray [7].

a *Bin 10* CRISPR array 1

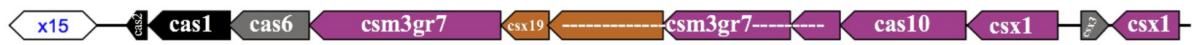

*Bin 10* CRISPR array 2-3

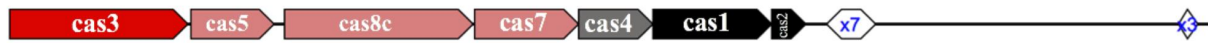

b *Prosthecochloris* sp. CIB 2401 CRISPR array 1

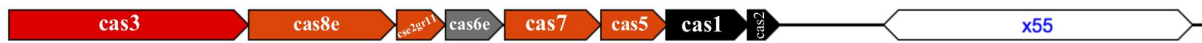

212  
213 **Figure S17.** CRISPR arrays and *cas* genes predictions from (a) *Bin 10* and (b)  
214 *Prosthecochloris* sp. CIB 2401. CRISPR arrays are in white with the number of repeats,  
215 and *cas* genes are color-coded according to types/subtypes. Cas1 and cas2, which are  
216 present in most known CRISPR-Cas systems, are in black; cas3 and cas10, which are  
217 the signatures of CRISPR-Cas systems types along with Cas9 (Type II), are in red  
218 (Type I) and purple (Type III), respectively; variants of the multi-subunit complex (csm),  
219 cas10, and csx Type III genes are also in purple, and dispensable components, such as  
220 cas6, are in gray [7].  
221

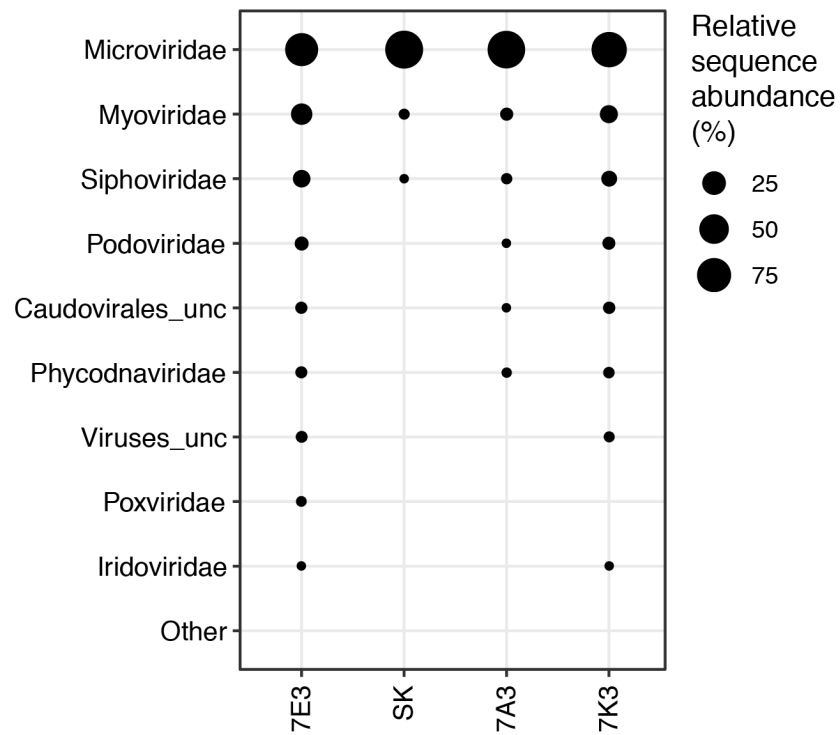

222  
 223  
 224  
 225  
 226  
 227  
 228  
 229  
 230

**Figure S18.** Relative sequence abundance of viral family-level clades based on viral sequences retrieved from metagenomes of timepoint 7 (7A3, 7E3 and 7K3) and from a phototrophic enrichment culture (SK). Unclassified family-level clades are marked by the suffix `_unc`.



231 Table S1: Overview of sequencing output and diversity indices

|     | M.reads | M.sobs.r.mean | M.chao1.r.mean | M.invs.r.mean | M.SSO abs.nr | M.SSO rel.nr | M.shan.r.mean | M.SSO abs.pc | M.SSO rel.pc |
|-----|---------|---------------|----------------|---------------|--------------|--------------|---------------|--------------|--------------|
| 1A1 | 115879  | 1489          | 1893           | 108           | 9            | 28           | 5.9           | 0.4          | 1.3          |
| 1A2 | 13215   | 529           | 533            | 62            | 0            | 6            | 5.4           | 0            | 1.1          |
| 1A3 | 32266   | 821           | 853            | 47            | 1            | 6            | 5.6           | 0.1          | 0.7          |
| 1A4 | 30906   | 1033          | 1080           | 138           | 0            | 15           | 6.1           | 0            | 1.4          |
| 1E1 | 57122   | 1116          | 1244           | 88            | 1            | 16           | 5.8           | 0.1          | 1.2          |
| 1E2 | 63196   | 1205          | 1361           | 46            | 2            | 13           | 5.7           | 0.1          | 0.9          |
| 1E3 | 65596   | 1124          | 1247           | 22            | 2            | 12           | 5.4           | 0.2          | 0.9          |
| 1E4 | 65227   | 1410          | 1564           | 179           | 7            | 37           | 6.3           | 0.4          | 2.3          |
| 1K1 | 138540  | 1687          | 2176           | 103           | 6            | 28           | 6.1           | 0.2          | 1.2          |
| 1K4 | 125417  | 1623          | 2022           | 34            | 3            | 25           | 5.8           | 0.1          | 1.1          |
| 2A2 | 49647   | 784           | 861            | 6             | 0            | 13           | 3.8           | 0            | 1.5          |
| 2A4 | 41419   | 1180          | 1321           | 10            | 3            | 13           | 5             | 0.2          | 1            |
| 2E1 | 19251   | 738           | 754            | 86            | 0            | 5            | 5.5           | 0            | 0.7          |
| 2E2 | 53217   | 1109          | 1261           | 13            | 3            | 25           | 4.9           | 0.2          | 1.9          |
| 2E3 | 29494   | 412           | 437            | 4             | 0            | 1            | 2.7           | 0            | 0.2          |
| 2K1 | 44081   | 1301          | 1469           | 140           | 3            | 19           | 6.1           | 0.2          | 1.3          |
| 2K2 | 83011   | 538           | 652            | 3             | 0            | 4            | 2.3           | 0            | 0.6          |
| 2K3 | 46269   | 412           | 453            | 3             | 0            | 2            | 2.3           | 0            | 0.4          |
| 3A2 | 63664   | 702           | 813            | 5             | 0            | 8            | 3.3           | 0            | 1            |
| 3A3 | 57711   | 258           | 309            | 3             | 0            | 1            | 1.7           | 0            | 0.3          |
| 3E2 | 48213   | 356           | 409            | 2             | 0            | 4            | 2             | 0            | 1            |
| 3E3 | 57162   | 237           | 268            | 3             | 0            | 3            | 1.7           | 0            | 1.1          |
| 3K2 | 26817   | 542           | 570            | 8             | 0            | 3            | 3.8           | 0            | 0.5          |
| 3K3 | 63876   | 327           | 381            | 3             | 0            | 3            | 1.8           | 0            | 0.8          |
| 4A2 | 80676   | 347           | 440            | 2             | 0            | 1            | 1.6           | 0            | 0.2          |
| 4A3 | 61320   | 191           | 226            | 3             | 0            | 0            | 1.5           | 0            | 0            |
| 4A4 | 69614   | 1080          | 1224           | 10            | 1            | 10           | 4.6           | 0.1          | 0.8          |
| 4E2 | 145729  | 405           | 560            | 3             | 2            | 8            | 1.9           | 0.3          | 1.3          |
| 4E3 | 53079   | 224           | 262            | 3             | 0            | 1            | 1.7           | 0            | 0.4          |
| 4E4 | 68318   | 1266          | 1435           | 28            | 1            | 26           | 5.4           | 0.1          | 1.7          |

|     |            |      |      |     |   |    |     |     |     |
|-----|------------|------|------|-----|---|----|-----|-----|-----|
| 4K2 | 25595      | 562  | 587  | 7   | 0 | 4  | 3.8 | 0   | 0.7 |
| 4K3 | 66934      | 460  | 542  | 3   | 0 | 4  | 2.3 | 0   | 0.7 |
| 4K4 | 53867      | 1308 | 1445 | 67  | 2 | 26 | 6   | 0.1 | 1.7 |
| 5A2 | 49259      | 440  | 494  | 6   | 0 | 3  | 3.2 | 0   | 0.6 |
| 5A3 | 53923      | 178  | 214  | 2   | 0 | 0  | 1.4 | 0   | 0   |
| 5A4 | 93272      | 1443 | 1690 | 29  | 2 | 35 | 5.6 | 0.1 | 2   |
| 5E2 | 82674      | 497  | 621  | 3   | 1 | 9  | 2.6 | 0.2 | 1.4 |
| 5E3 | 70366      | 296  | 346  | 2   | 0 | 7  | 1.8 | 0   | 1.9 |
| 5E4 | 68855      | 1408 | 1590 | 92  | 5 | 15 | 6.1 | 0.3 | 0.9 |
| 5K2 | 91040      | 680  | 838  | 6   | 1 | 14 | 3.2 | 0.1 | 1.6 |
| 5K3 | 54366      | 627  | 705  | 6   | 0 | 5  | 3.4 | 0   | 0.7 |
| 5K4 | 73476      | 1679 | 1913 | 221 | 1 | 35 | 6.6 | 0   | 1.7 |
| 6A3 | 42452      | 249  | 282  | 3   | 0 | 1  | 1.8 | 0   | 0.4 |
| 6A4 | 46736      | 763  | 835  | 4   | 1 | 13 | 3.7 | 0.1 | 1.5 |
| 6E3 | 63322      | 541  | 628  | 3   | 1 | 6  | 2.8 | 0.2 | 0.9 |
| 6E4 | 71477      | 501  | 597  | 2   | 1 | 3  | 2.3 | 0.2 | 0.5 |
| 6K3 | 27235      | 325  | 340  | 4   | 0 | 2  | 2.6 | 0   | 0.6 |
| 6K4 | 12348<br>6 | 1801 | 2195 | 65  | 2 | 45 | 6.2 | 0.1 | 1.9 |
| 7A1 | 46214      | 832  | 937  | 57  | 1 | 16 | 5.2 | 0.1 | 1.7 |
| 7A2 | 93221      | 926  | 1121 | 16  | 0 | 17 | 4.5 | 0   | 1.4 |
| 7A3 | 97430      | 399  | 515  | 2   | 0 | 7  | 1.6 | 0   | 1.3 |
| 7A4 | 67784      | 556  | 643  | 2   | 0 | 6  | 2.1 | 0   | 0.9 |
| 7E1 | 78709      | 1108 | 1284 | 82  | 0 | 20 | 5.6 | 0   | 1.5 |
| 7E2 | 79334      | 576  | 670  | 7   | 0 | 11 | 3.5 | 0   | 1.5 |
| 7E3 | 11406      | 108  | 108  | 3   | 0 | 1  | 2   | 0   | 0.9 |
| 7E4 | 61491      | 794  | 899  | 6   | 1 | 17 | 3.8 | 0.1 | 1.8 |
| 7K1 | 68100      | 1399 | 1564 | 224 | 2 | 21 | 6.3 | 0.1 | 1.3 |
| 7K2 | 30559      | 578  | 607  | 11  | 1 | 8  | 4.1 | 0.2 | 1.3 |
| 7K3 | 23119      | 279  | 285  | 4   | 0 | 0  | 2.9 | 0   | 0   |
| 8A1 | 16716<br>7 | 1231 | 1663 | 44  | 3 | 14 | 5.2 | 0.2 | 0.7 |
| 8A2 | 89281      | 472  | 579  | 2   | 0 | 8  | 2   | 0   | 1.3 |
| 8A3 | 95105      | 1151 | 1399 | 8   | 2 | 17 | 4.3 | 0.1 | 1.1 |
| 8A4 | 85462      | 1087 | 1286 | 7   | 2 | 22 | 4.2 | 0.1 | 1.6 |
| 8E1 | 65838      | 1518 | 1709 | 294 | 3 | 23 | 6.5 | 0.2 | 1.3 |
| 8E2 | 76104      | 599  | 697  | 6   | 2 | 12 | 3.5 | 0.3 | 1.6 |

|     |            |      |      |     |    |    |     |     |     |
|-----|------------|------|------|-----|----|----|-----|-----|-----|
| 8E3 | 13956<br>3 | 797  | 1040 | 16  | 1  | 21 | 4.1 | 0.1 | 1.8 |
| 8E4 | 89647      | 1380 | 1627 | 37  | 1  | 27 | 5.5 | 0.1 | 1.6 |
| 8K1 | 92541      | 1439 | 1689 | 157 | 5  | 22 | 6.3 | 0.3 | 1.2 |
| 8K2 | 32515<br>8 | 1862 | 2657 | 101 | 6  | 65 | 6.1 | 0.2 | 1.9 |
| 8K3 | 57386<br>9 | 1963 | 3078 | 39  | 16 | 74 | 5.6 | 0.4 | 1.7 |
| 8K4 | 21082<br>5 | 1273 | 1784 | 8   | 3  | 39 | 4   | 0.1 | 1.8 |

232

233 **Table S2:** Genome statistics. Summary information for genomes binned determined by  
234 CheckM.  
235

| <b>Genome name</b> | <b>Genome size (MB)</b> | <b>GC (%)</b> | <b>Nr. of contigs</b> | <b>Completeness (%)</b> | <b>Contamination (%)</b> | <b>Heterogeneity (%)</b> |
|--------------------|-------------------------|---------------|-----------------------|-------------------------|--------------------------|--------------------------|
| Bin 6              | 2.46                    | 56.2          | 235                   | 97.84                   | 0                        | 0                        |
| Bin 10             | 2.38                    | 51.1          | 112                   | 93.1                    | 0                        | 0                        |

236  
237  
238  
239  
240  
241  
242  
243  
244  
245  
246  
247  
248  
249  
250  
251  
252

253 **Table S3:** Average nucleotide identity (ANI) comparisons to the closest relatives using  
 254 OrthoANLu algorithm [14].  
 255

| <b>Name</b>                       | <b>Contigs</b> | <b>Total length (bp)</b> | <b>GC content (%)</b> | <b>ANI (%)</b> |
|-----------------------------------|----------------|--------------------------|-----------------------|----------------|
| Bin 6                             | 235            | 2,460,404                | 56.35                 | 85.13          |
| Chlorobaculum parvum<br>NCIB 8327 | 1              | 2,289,249                | 55.8                  |                |
| Bin 10                            | 112            | 2,375,588                | 51.44                 | 85.82          |
| Prosthecochloris sp. CIB<br>2401  | 1              | 2,399,849                | 52.13                 |                |

256  
 257  
 258  
 259  
 260  
 261  
 262  
 263  
 264  
 265  
 266  
 267  
 268

269 **Table S4:** CRISPR-Cas system information for each metagenome-assembled genome

| <b>Name</b> | <b>CRISPR array</b> | <b>contig</b> | <b>location (bp)</b> | <b>length</b> | <b># spacers</b> | <b>DR length</b> |
|-------------|---------------------|---------------|----------------------|---------------|------------------|------------------|
|             |                     |               |                      |               |                  |                  |
| Bin 6       | CRISPR1             | 26            | 20933-26430          | 42829         | 82               | 30               |
| Bin 6       | CRISPR2             | 145           | 613-1685             | 16001         | 14               | 35               |
| Bin 6       | CRISPR3             | 145           | 198-278              | 16001         | 2                | 35               |
|             |                     |               |                      |               |                  |                  |
| Bin 10      | CRISPR1             | 20            | 3561-4695            | 55534         | 14               | 37               |
| Bin 10      | CRISPR2             | 316           | 7079-7510            | 10315         | 6                | 32               |
| Bin 10      | CRISPR3             | 316           | 10128-10293          | 10315         | 2                | 33               |

270  
 271  
 272  
 273  
 274  
 275  
 276  
 277  
 278  
 279  
 280

281 **Supplementary References**

282

283 1. Gower JC. Generalized Procrustes analysis. *Psychometrika*. 1975;40:33–51.

284 2. Gobet A, Böer SI, Huse SM, van Beusekom JEE, Quince C, Sogin ML, et al. Diversity  
285 and dynamics of rare and of resident bacterial populations in coastal sands. *ISME J*  
286 [Internet]. 2012;6:542–53. Available from:

287 <http://www.nature.com/doi/10.1038/ismej.2011.132>

288 3. Eren AM, Esen C, Quince C, Vineis JH, Morrison HG, Sogin ML, et al. Anvi'o: an  
289 advanced analysis and visualization platform for 'omics data. 2015;1–29.

290 4. Wattam AR, Abraham D, Dalay O, Disz TL, Driscoll T, Gabbard JL, et al. PATRIC,  
291 the bacterial bioinformatics database and analysis resource. *Nucleic Acids Res*  
292 [Internet]. Oxford University Press; 2014 [cited 2019 Feb 14];42:D581-91. Available  
293 from: <http://www.ncbi.nlm.nih.gov/pubmed/24225323>

294 5. Wattam AR, Davis JJ, Assaf R, Boisvert S, Brettin T, Bun C, et al. Improvements to  
295 PATRIC, the all-bacterial bioinformatics database and analysis resource center. *Nucleic*  
296 *Acids Res*. 2017;45:D535–42.

297 6. Makarova KS, Wolf YI, Alkhnbashi OS, Costa F, Shah SA, Saunders SJ, et al. An  
298 updated evolutionary classification of CRISPR–Cas systems. *Nat Rev Microbiol*  
299 [Internet]. Nature Publishing Group; 2015 [cited 2019 Feb 14];13:722–36. Available  
300 from: <http://www.nature.com/articles/nrmicro3569>

301
